# Supplementary material
Source: PubMed Central journal article supplement (PMC4380200)
Supplement: np5007907_si_001.pdf [file np5007907_si_001.pdf]

# Depsipeptide Companeramides from a Panamanian Marine Cyanobacterium Associated with the Coibamide Producer

Oliver B. Vining,<sup>†</sup> Rebecca A. Medina,<sup>†</sup> Edward A. Mitchell,<sup>†</sup> Patrick Videau,<sup>†</sup>

Dong Li,<sup>†</sup> Jeffrey D. Serrill,<sup>†</sup> Jane X. Kelly,<sup>‡</sup> William H. Gerwick,<sup>§</sup> Philip J.

Proteau,<sup>†</sup> Jane E. Ishmael,<sup>†</sup> Kerry L. McPhail.<sup>†,\*</sup>

<sup>†</sup>Department of Pharmaceutical Sciences, College of Pharmacy, Oregon State University,

Corvallis, Oregon 97331, <sup>‡</sup>Veterans Affairs Medical Center, Portland, OR 97239, <sup>§</sup>Center for

Marine Biotechnology and Biomedicine, Scripps Institution of Oceanography and Skaggs School

of Pharmacy and Pharmaceutical Sciences, University of California San Diego, La Jolla,

California 92093.

---

**Contents**

---

|                                                                                                                                                                      |       |
|----------------------------------------------------------------------------------------------------------------------------------------------------------------------|-------|
| <b>Table S1.</b> NMR Spectroscopic Data for Companeramide A (1) in CDCl <sub>3</sub> (700 MHz).....                                                                  | 3     |
| <b>Table S2.</b> NMR Spectroscopic Data Companeramide B (2) in CDCl <sub>3</sub> (700 MHz).....                                                                      | 4     |
| <b>S3.</b> <sup>1</sup> H NMR spectrum for companeramide A (1) in CDCl <sub>3</sub> (700 MHz).....                                                                   | 6     |
| <b>S4.</b> <sup>13</sup> C NMR spectrum for companeramide A (1) in CDCl <sub>3</sub> (175 MHz).....                                                                  | 7     |
| <b>S5.</b> DQF COSY spectrum for companeramide A (1) in CDCl <sub>3</sub> (700 MHz).....                                                                             | 8     |
| <b>S6.</b> Multiplicity-edited HSQC spectrum for companeramide A (1) in CDCl <sub>3</sub> (700 MHz).....                                                             | 9     |
| <b>S7.</b> HMBC spectrum for companeramide A (1) in CDCl <sub>3</sub> (700 MHz).....                                                                                 | 10    |
| <b>S7A-E.</b> Expanded partial HMBC spectra for companeramide A (1) in CDCl <sub>3</sub> (700 MHz).....                                                              | 11-15 |
| <b>S8.</b> ROESY spectrum for companeramide A (1) in CDCl <sub>3</sub> (700 MHz).....                                                                                | 16    |
| <b>S9.</b> <sup>1</sup> H NMR spectrum for companeramide B (2) in CDCl <sub>3</sub> (700 MHz).....                                                                   | 17    |
| <b>S10.</b> <sup>13</sup> C NMR spectrum for companeramide B (2) in CDCl <sub>3</sub> (175 MHz).....                                                                 | 18    |
| <b>S11.</b> COSY spectrum for companeramide B (2) in CDCl <sub>3</sub> (700 MHz).....                                                                                | 19    |
| <b>S12.</b> Multiplicity-edited HSQC spectrum for companeramide B (2) in CDCl <sub>3</sub> (700 MHz).....                                                            | 20    |
| <b>S13.</b> HMBC spectrum for companeramide B (2) in CDCl <sub>3</sub> (700 MHz).....                                                                                | 21    |
| <b>S13A-E.</b> Expanded partial HMBC spectra for companeramide B (2) in CDCl <sub>3</sub> (700 MHz).....                                                             | 22-26 |
| <b>S14.</b> ROESY spectrum for companeramide B (2) in CDCl <sub>3</sub> (700 MHz).....                                                                               | 27    |
| <b>S15.</b> MS/MS spectrum for companeramide A (1).....                                                                                                              | 28    |
| <b>S16.</b> MS/MS spectrum for companeramide B (2).....                                                                                                              | 29    |
| <b>S17.</b> Annotated MS/MS spectrum for companeramide B tetrapeptide (fragment 1).....                                                                              | 30    |
| <b>S18.</b> Concentration-response profiles for companeramides A (1) and B (2)<br>against three strains of <i>Plasmodium falciparum</i> .....                        | 31    |
| <b>S19.</b> Experimental for 16S rRNA phylogenetic analysis.....                                                                                                     | 32    |
| <b>S20.</b> Phylogenetic alignment tree showing relationship of the cultured small filament<br>cyanobacterium from the companeramide-producing field collection..... | 34    |
| <b>S21.</b> Phase contrast micrograph (60 X magnification) of the laboratory<br>cultured cyanobacterial assemblage from field collection PAC-10-3.....               | 35    |

---

**Table S1.** NMR Spectroscopic Data for Companeramide A (**1**) in CDCl<sub>3</sub> (700 MHz)

| Unit       | Position | $\delta_{\text{H}}$ , mult. (J, Hz)      | $\delta_{\text{C}}$ , mult. | COSY       | HMBC                                     | ROESY                             |
|------------|----------|------------------------------------------|-----------------------------|------------|------------------------------------------|-----------------------------------|
| AMOYA      | 1        |                                          | 174.3, C                    |            |                                          |                                   |
|            | 2        | 2.51, dq (7.2, 7.2)                      | 46.4, CH                    | 3, 9       | 1, 3, 4, 9                               | 3, 9                              |
|            | 3        | 3.97, m                                  | 51.2, CH                    | 2, 3-NH, 4 |                                          | 2, 3-NH, 4, 5, 9                  |
|            | 3-NH     | 6.75, br d, (6.5)                        |                             | 3          |                                          | 11, 17                            |
|            | 4        | 1.71, obs<br>1.63, obs                   | 31.3, CH <sub>2</sub>       | 3, 5       |                                          | 3, 5                              |
|            | 5        | 1.54, m<br>1.48, obs                     | 25.2, CH <sub>2</sub>       | 4, 6       | 4, 7<br>4, 7                             | 4a, 4b, 6                         |
|            | 6        | 2.17, obs                                | 17.9, CH <sub>2</sub>       | 5, 8       | 4, 5, 7, 8                               | 5a, 5b, 8                         |
|            | 7        |                                          | 83.8, C                     |            |                                          |                                   |
|            | 8        | 1.89, t (2.6)                            | 68.6, CH                    | 6          | 6, 7                                     | 6                                 |
| N-Me-Val-1 | 9        | 1.31, d (7.5)                            | 14.2, CH <sub>3</sub>       | 2          | 1, 2, 3                                  | 2, 3                              |
|            | 10       |                                          | 170.1, C                    |            |                                          |                                   |
|            | 11       | 4.58, d (11.2)                           | 62.8, CH                    | 12         | 10, 12, 13, 14, 15,<br>16                | 12, 13, 15                        |
|            | 12       | 2.29, obs                                | 25.6, CH                    | 11, 13, 14 | 10, 11, 13, 14, 15                       | 11, 13, 14, 15                    |
|            | 13       | 0.95, d (6.4)                            | 19.4, CH <sub>3</sub>       | 12         | 11, 12, 14                               | 12, 14                            |
|            | 14       | 0.88, d (6.7)                            | 18.4, CH <sub>3</sub>       | 12         | 11, 12, 13                               | 11, 12, 14, 15                    |
|            | 15       | 3.14, s                                  | 30.2, CH <sub>3</sub>       |            | 11, 16                                   | 11, 12, 13, 17, 18                |
|            | 16       |                                          | 174.4, C                    |            |                                          |                                   |
|            | 17       | 4.72, obs                                | 46.2, CH                    | 17-NH, 18  | 16, 18, 19                               | 15, 18                            |
| Ala        | 17-NH    | 8.86, d (6.3)                            |                             | 17         | 19                                       | 17                                |
|            | 18       | 1.32, d (7.0)                            | 16.4, CH <sub>3</sub>       | 17         | 16, 17                                   | 15, 17                            |
|            | 19       |                                          | 169.4, C                    |            |                                          |                                   |
|            | 20       | 4.67, dd (9.7, 4.9)                      | 58.6, CH                    | 21         | 19, 21, 22, 23, 24,<br>25, 26            | 21, 22, 23, 24, 25,<br>27         |
|            | 21       | 1.83, ddd (14.5,<br>8.5, 4.9)<br>1.59, m | 36.7, CH <sub>2</sub>       | 20, 22     | 19, 20, 22, 23, 24<br>19, 20, 22, 23, 24 | 20, 22, 23, 24, 25                |
|            | 22       | 1.41, obs                                | 24.2, CH                    | 21, 23, 24 | 21                                       | 20, 21, 23, 24, 25                |
|            | 23       | 0.92, d (6.6)                            | 22.2, CH <sub>3</sub>       | 22         | 21, 22, 24                               | 20, 21, 22, 24                    |
|            | 24       | 0.91, d (6.8)                            | 24.3, CH <sub>3</sub>       | 22         | 21, 22, 23                               | 20, 21, 22, 23                    |
|            | 25       | 2.69, s                                  | 28.8, CH <sub>3</sub>       |            | 20, 26                                   | 20, 21, 22, 27                    |
| Pro        | 26       |                                          | 172.4, C                    |            |                                          |                                   |
|            | 27       | 4.92, dd (7.4, 6.4)                      | 55.4, CH                    | 28         | 26, 28, 29, 30, 31                       | 20, 25, 28a, 28b,<br>29a, 29b     |
|            | 28       | 2.11, m<br>2.00, m                       | 29.6, CH <sub>2</sub>       | 27, 29     | 26, 29, 30<br>27, 29, 30                 | 27, 30a, 30b                      |
|            | 29       | 2.28, obs<br>1.94, m                     | 25.6, CH <sub>2</sub>       | 28, 30     | 27, 28<br>27, 28, 30                     | 27, 30a, 30b                      |
|            | 30       | 3.84, m<br>3.76, dt (9.9, 7.5)           | 48.0, CH <sub>2</sub>       | 29         | 27, 28, 29<br>28, 29                     | 28a, 28b, 29a, 29b,<br>32, 33, 34 |
|            | 31       |                                          | 170.0, C                    |            |                                          |                                   |
|            | 32       | 4.74, dd (8.9, 6.9)                      | 54.0, CH                    | 32-NH, 33  | 31, 33, 34, 35                           | 30a, 30b, 32-NH,<br>33, 34        |
|            | 32-NH    | 6.91, d (8.9)                            |                             | 32         | 37                                       | 32, 38                            |
|            | 33       | 1.69, obs                                | 38.6, CH                    | 32, 34, 35 |                                          | 30b, 32, 34, 35a,<br>35b, 36      |
| N-Me-Val-2 | 34       | 0.92, d (6.5)                            | 15.4, CH <sub>3</sub>       | 33         | 32, 33, 35                               | 30a, 30b, 32, 33                  |
|            | 35       | 1.39, m<br>1.06, obs                     | 24.3, CH <sub>2</sub>       | 33, 36     |                                          | 33, 36                            |
|            | 36       | 0.83, dd (7.5, 4.8)                      | 11.0, CH <sub>3</sub>       | 35         | 33, 34, 35                               | 33, 35a, 35b                      |
|            | 37       |                                          | 169.5, C                    |            |                                          |                                   |
|            | 38       | 4.71, obs                                | 61.7, CH                    | 39         | 37, 39, 40, 41                           | 32-NH, 39, 40, 41,<br>42          |
|            | 39       | 2.27, obs                                | 25.7, CH                    | 38, 40, 41 | 37, 38, 40, 41                           | 38, 40, 41, 42                    |
|            | 40       | 0.94, d (6.3)                            | 19.9, CH <sub>3</sub>       | 39         | 38, 39, 41                               | 38, 39, 41, 42                    |
|            | 41       | 0.77, d (6.8)                            | 17.9, CH <sub>3</sub>       | 39         | 38, 39, 40                               | 38, 39, 40, 42                    |
|            | 42       | 3.06, s                                  | 30.5, CH <sub>3</sub>       |            | 38, 43                                   | 38, 39, 40, 41, 45,<br>46         |
| Ile-2      | 43       |                                          | 172.3, C                    |            |                                          |                                   |

|          |       |                     |                       |            |                   |                          |
|----------|-------|---------------------|-----------------------|------------|-------------------|--------------------------|
|          | 44    | 4.72, obs           | 53.0, C               | 44-NH, 45  | 43, 45            | 44-NH, 45, 46            |
|          | 44-NH | 6.92, d (8.8)       |                       | 44         | 49                | 44, 50                   |
|          | 45    | 1.74, obs           | 37.3, CH              | 44, 46, 47 | 44                | 42, 44, 46, 47a, 47b, 48 |
|          | 46    | 0.84, d (6.7)       | 15.0, CH <sub>3</sub> | 45         | 44, 45, 47        | 42, 44, 45, 47, 48       |
|          | 47    | 1.48, obs           | 23.4, CH <sub>2</sub> | 45, 48     | 44, 45, 48        | 45, 46, 48               |
|          |       | 1.07, obs           |                       |            | 45, 46            |                          |
| N-Me-Ala | 48    | 0.82, dd (7.4, 5.0) | 11.0, CH <sub>3</sub> | 47         |                   | 45, 46, 47               |
|          | 49    |                     | 170.1, C              |            |                   |                          |
|          | 50    | 5.26, q (7.3)       | 51.7, CH              | 51         | 49, 51, 52, 53    | 44-NH, 51, 52            |
|          | 51    | 1.31, d (7.3)       | 13.5, CH <sub>3</sub> | 50         | 49, 50            | 50, 52                   |
|          | 52    | 2.92, s             | 30.5, CH <sub>3</sub> |            | 50, 51, 53        | 50, 51, 54, 55, 56, 57   |
| Hiva     | 53    |                     | 171.1, C              |            |                   |                          |
|          | 54    | 4.80, d (8.3)       | 75.4, CH              | 55         | 1, 53, 55, 56, 57 | 52, 55, 56, 57           |
|          | 55    | 2.19, obs           | 30.1, CH              | 54, 56, 57 | 53, 54, 56, 57    | 52, 54, 56, 57           |
|          | 56    | 1.04, d (6.6)       | 18.6, CH <sub>3</sub> | 55         | 54, 55, 57        | 52, 54, 55, 57           |
|          | 57    | 0.93, d (5.7)       | 17.8, CH <sub>3</sub> | 55         | 54, 55, 56        | 52, 54, 55, 56           |

**Table S2.** NMR Spectroscopic Data Companeramide B (**2**) in CDCl<sub>3</sub> (700 MHz)

| Unit       | Position | $\delta_{\text{H}}$ , mult. (J, Hz) | $\delta_{\text{C}}$ , mult. | COSY       | HMBC               | ROESY                      |
|------------|----------|-------------------------------------|-----------------------------|------------|--------------------|----------------------------|
| AMO        | 1        |                                     | 175.4, C                    |            |                    |                            |
|            | 2        | 2.63, m                             | 46.0, CH                    | 3, 9       | 1, 3, 9            | 3, 3-NH, 4, 9              |
|            | 3        | 3.81, m                             | 52.4, CH                    | 2, 3-NH, 4 |                    | 2, 3-NH, 4, 5, 9, 11       |
|            | 3-NH     | 7.44, d (6.0)                       |                             | 3          | 10                 | 2, 3, 4b, 9, 11, 13        |
|            | 4        | 1.93, m                             | 30.2, CH <sub>2</sub>       | 3, 5       | 8                  | 2, 3, 3-NH, 13             |
|            |          | 1.73, m                             |                             |            |                    |                            |
|            | 5        | 1.53, m                             | 25.5, CH <sub>2</sub>       | 4, 6       | 3, 4, 6, 7         | 3, 6                       |
|            |          | 1.45, m                             |                             |            |                    |                            |
|            | 6        | 2.18, m                             | 18.0, CH <sub>2</sub>       | 5, 8       | 4, 7, 8            | 4, 5                       |
|            | 7        |                                     | 83.4, C                     |            |                    |                            |
|            | 8        | 1.91, obs                           | 69.4, CH                    | 6          | 7                  |                            |
|            | 9        | 1.36, obs                           | 14.2, CH <sub>3</sub>       | 2          | 1, 2               | 2, 3, 3-NH, 11             |
| N-Me-Val-1 | 10       |                                     | 170.2, C                    |            |                    |                            |
|            | 11       | 4.72, d (11.2)                      | 62.4, CH                    | 12         | 12, 13, 15         | 3, 3-NH, 9, 12, 13, 14     |
|            | 12       | 2.27, m                             | 26.5, CH                    | 11, 13, 14 | 11                 | 11, 13, 14, 15             |
|            | 13       | 0.96, obs                           | 18.5, CH <sub>3</sub>       | 12         | 11                 | 11, 12, 14, 15             |
|            | 14       | 0.81, obs                           | 19.9, CH <sub>3</sub>       | 12         | 11                 | 11, 12, 13, 15             |
|            | 15       | 3.23, s                             | 30.9, CH <sub>3</sub>       |            | 11, 16             | 12, 13, 14, 17, 18, 19, 20 |
| Val-1      | 16       |                                     | 173.4, C                    |            |                    |                            |
|            | 17       | 4.58, dd (8.3, 7.8)                 | 55.5, CH                    | 17-NH, 18  | 16, 18, 21         | 15, 17-NH, 18, 19, 20      |
|            | 17-NH    | 8.84, d (7.8)                       |                             | 17         | 17, 18             | 17, 18, 19, 20, 22, 23, 26 |
|            | 18       | 2.13, m                             | 30.5, CH                    | 17, 19, 20 | 17, 21             | 15, 17, 17-NH, 19, 20      |
|            | 19       | 0.91, obs                           | 18.8, CH <sub>3</sub>       | 18         |                    | 15, 17, 17-NH, 18, 20      |
|            | 20       | 0.93, obs                           | 18.7, CH <sub>3</sub>       | 18         |                    | 15, 17, 17-NH, 18, 19      |
| N-Me-Ala-1 | 21       |                                     | 169.8, C                    |            |                    |                            |
|            | 22       | 4.96, q (6.8)                       | 56.1, CH                    | 23         | 21, 23, 24, 25     | 17-NH, 23, 24              |
|            | 23       | 1.32, d (6.8)                       | 15.3, CH <sub>3</sub>       | 22         | 21, 22, 25         | 17-NH, 22, 24              |
|            | 24       | 2.74, s                             | 29.1, CH <sub>3</sub>       |            | 22, 25             | 17-NH, 22, 23              |
| Pro        | 25       |                                     | 171.8, C                    |            |                    |                            |
|            | 26       | 4.83, obs                           | 55.4, CH                    | 27         | 25, 27, 28, 29, 30 | 17-NH, 27, 28              |
|            | 27       | 2.10, m                             | 29.8, CH <sub>2</sub>       | 26, 28     | 26, 29             | 26, 29                     |
|            |          | 2.04, m                             |                             |            |                    |                            |
|            | 28       | 2.29, m                             | 25.6, CH <sub>2</sub>       | 27, 29     | 26, 29             | 26, 29                     |
|            |          | 1.97, m                             |                             |            |                    |                            |
|            | 29       | 3.83, m                             | 48.0, CH <sub>2</sub>       | 28         | 26, 27, 28         | 27, 28, 31, 32, 33         |
|            |          | 3.72, m                             |                             |            |                    |                            |

|            |       |                                 |                       |            |                    |                            |
|------------|-------|---------------------------------|-----------------------|------------|--------------------|----------------------------|
| Ile        | 30    |                                 | 170.2, C              |            |                    |                            |
|            | 31    | 4.76, m                         | 54.4, CH              | 31-NH, 32  | 30, 32, 33, 34     | 31-NH, 32, 33, 34, 35      |
|            | 31-NH | 7.48, d (8.5)                   |                       | 31         | 31, 36             | 21, 32, 33, 34, 37         |
|            | 32    | 1.70, obs                       | 39.0, CH              | 31, 33, 34 | 31, 33             | 29, 31, 31-NH, 33, 35      |
|            | 33    | 0.93, obs                       | 15.5, CH <sub>3</sub> | 32         | 31, 32, 34, 35     | 29, 31, 31-NH, 32, 34, 25  |
| N-Me-Val-2 | 34    | 1.39, m<br>1.06, m<br>0.87, obs | 24.7, CH <sub>2</sub> | 32, 35     | 31, 32, 35         | 31, 31-NH, 33, 35          |
|            | 35    |                                 | 11.7, CH <sub>3</sub> | 34         | 32                 | 31, 32, 33, 34             |
|            | 36    |                                 | 169.3, C              |            |                    |                            |
|            | 37    | 4.90, d (11.1)                  | 62.0, CH              | 38         | 36, 38, 39, 40, 41 | 31-NH, 38, 39, 40, 41      |
|            | 38    | 2.33, m                         | 25.8, CH              | 37, 39, 40 | 37                 | 37, 39, 40, 41             |
| Val-2      | 39    | 0.98, obs                       | 19.9, CH <sub>3</sub> | 38         | 37                 | 37, 38, 40, 41             |
|            | 40    | 0.78, d (6.5)                   | 18.7, CH <sub>3</sub> | 38         | 37                 | 37, 38, 39                 |
|            | 41    | 3.06, s                         | 30.8, CH <sub>3</sub> |            | 37, 42             | 31-NH, 37, 38, 39          |
|            | 42    |                                 | 172.4, C              |            |                    |                            |
|            | 43    | 4.67, dd (9.3, 8.9)             | 54.7, CH              | 43-NH, 44  | 42, 44, 45, 46, 47 | 41, 43-NH, 44, 45, 46      |
| N-Me-Ala-2 | 43-NH | 6.80, d (9.3)                   |                       | 43         | 43, 47             | 41, 43, 44, 45, 46, 48, 50 |
|            | 44    | 2.00, m                         | 31.1, CH              | 43, 45, 46 | 43                 | 43, 43-NH, 44, 45, 46      |
|            | 45    | 0.93, obs                       | 19.2, CH <sub>3</sub> | 44         | 43                 | 43, 44, 46                 |
|            | 46    | 0.91, obs                       | 18.4, CH <sub>3</sub> | 44         |                    | 43, 44, 45                 |
|            | 47    |                                 | 170.3, C              |            |                    |                            |
| Hiva       | 48    | 5.40, q (7.0)                   | 52.2, CH              | 49         | 47, 49, 50         | 43-NH, 49, 50              |
|            | 49    | 1.35, obs                       | 13.8, CH <sub>3</sub> | 48         | 48                 | 48, 50                     |
|            | 50    | 2.89, s                         | 30.7, CH <sub>3</sub> |            | 48, 51             | 43-NH, 48, 49, 52, 54, 55  |
| Hiva       | 51    |                                 | 170.8, C              |            |                    |                            |
|            | 52    | 4.80, d (7.7)                   | 75.5, CH              | 53         | 1, 53, 54, 55      | 50, 53, 54, 55             |
|            | 53    | 2.19, m                         | 30.1, CH              | 52, 54, 55 | 52, 54, 55         | 50, 52, 54, 55             |
|            | 54    | 1.08, d (6.9)                   | 18.2, CH <sub>3</sub> | 53         | 52, 53, 55         | 50, 52, 53                 |
|            | 55    | 1.00, d (6.5)                   | 18.2, CH <sub>3</sub> | 53         | 52, 53, 54         | 50, 52, 53                 |

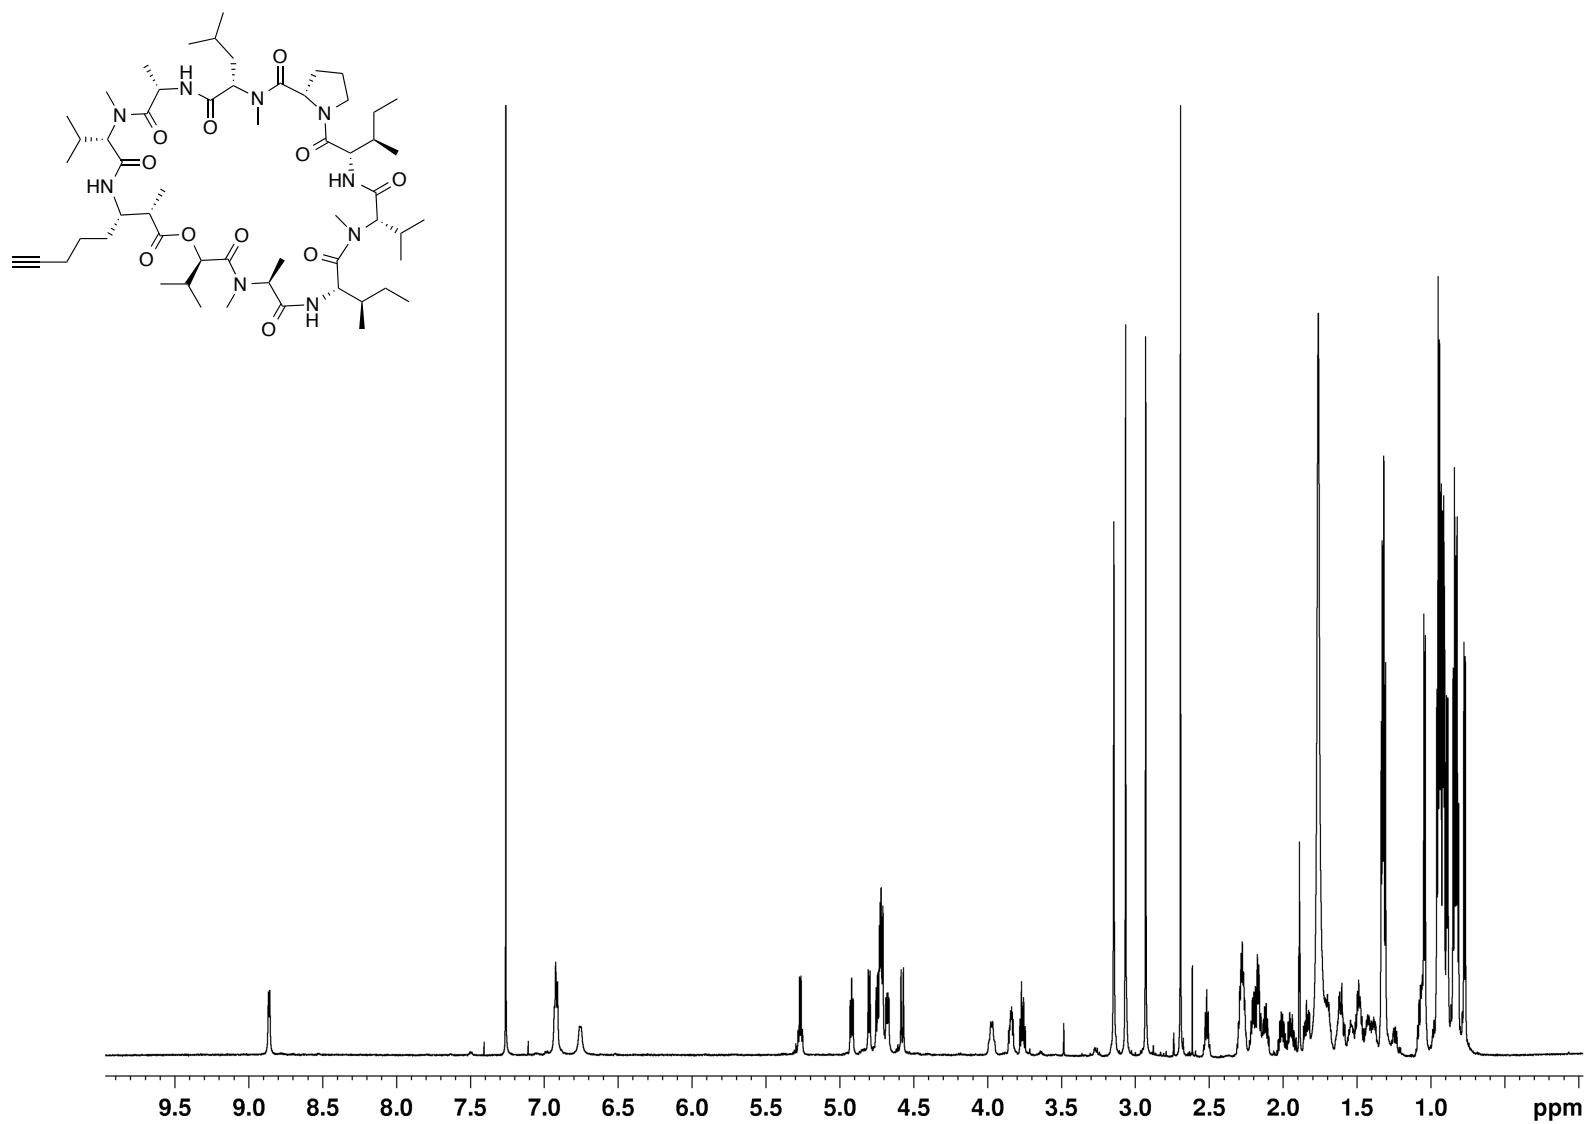

**Figure S3.** <sup>1</sup>H NMR spectrum for companeramide A (**1**) in CDCl<sub>3</sub> (700 MHz)

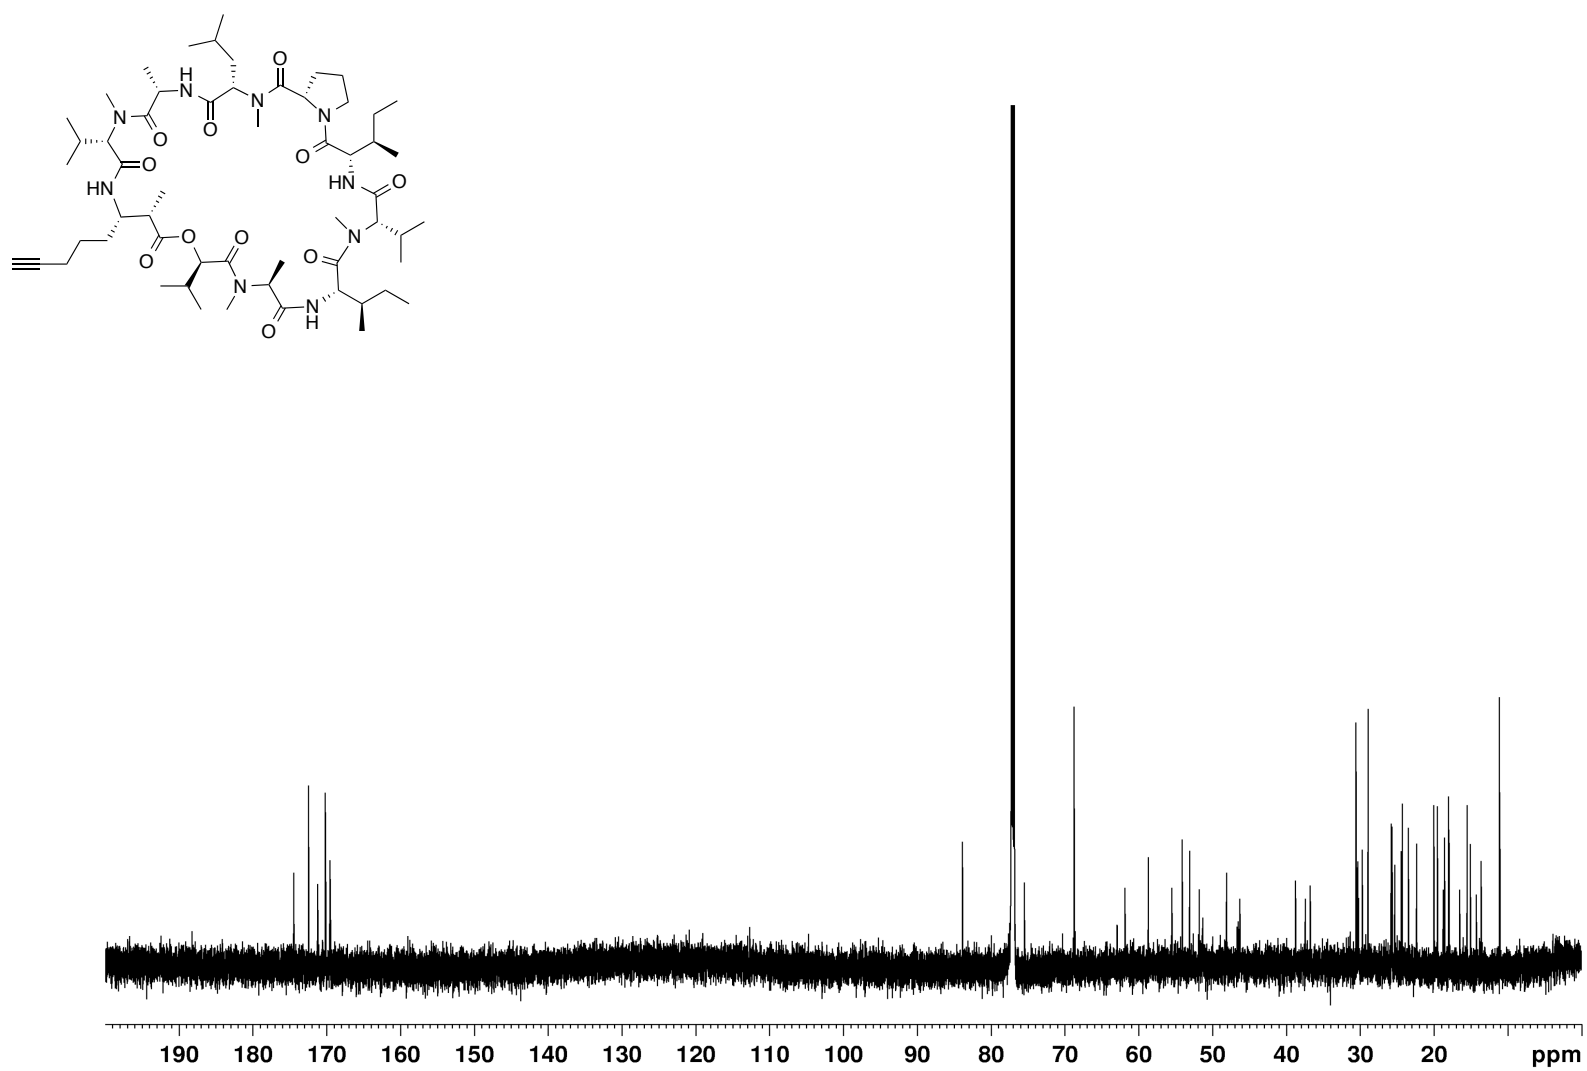

**Figure S4.**  $^{13}\text{C}$  NMR spectrum for companeramide A (1) in  $\text{CDCl}_3$  (175 MHz)

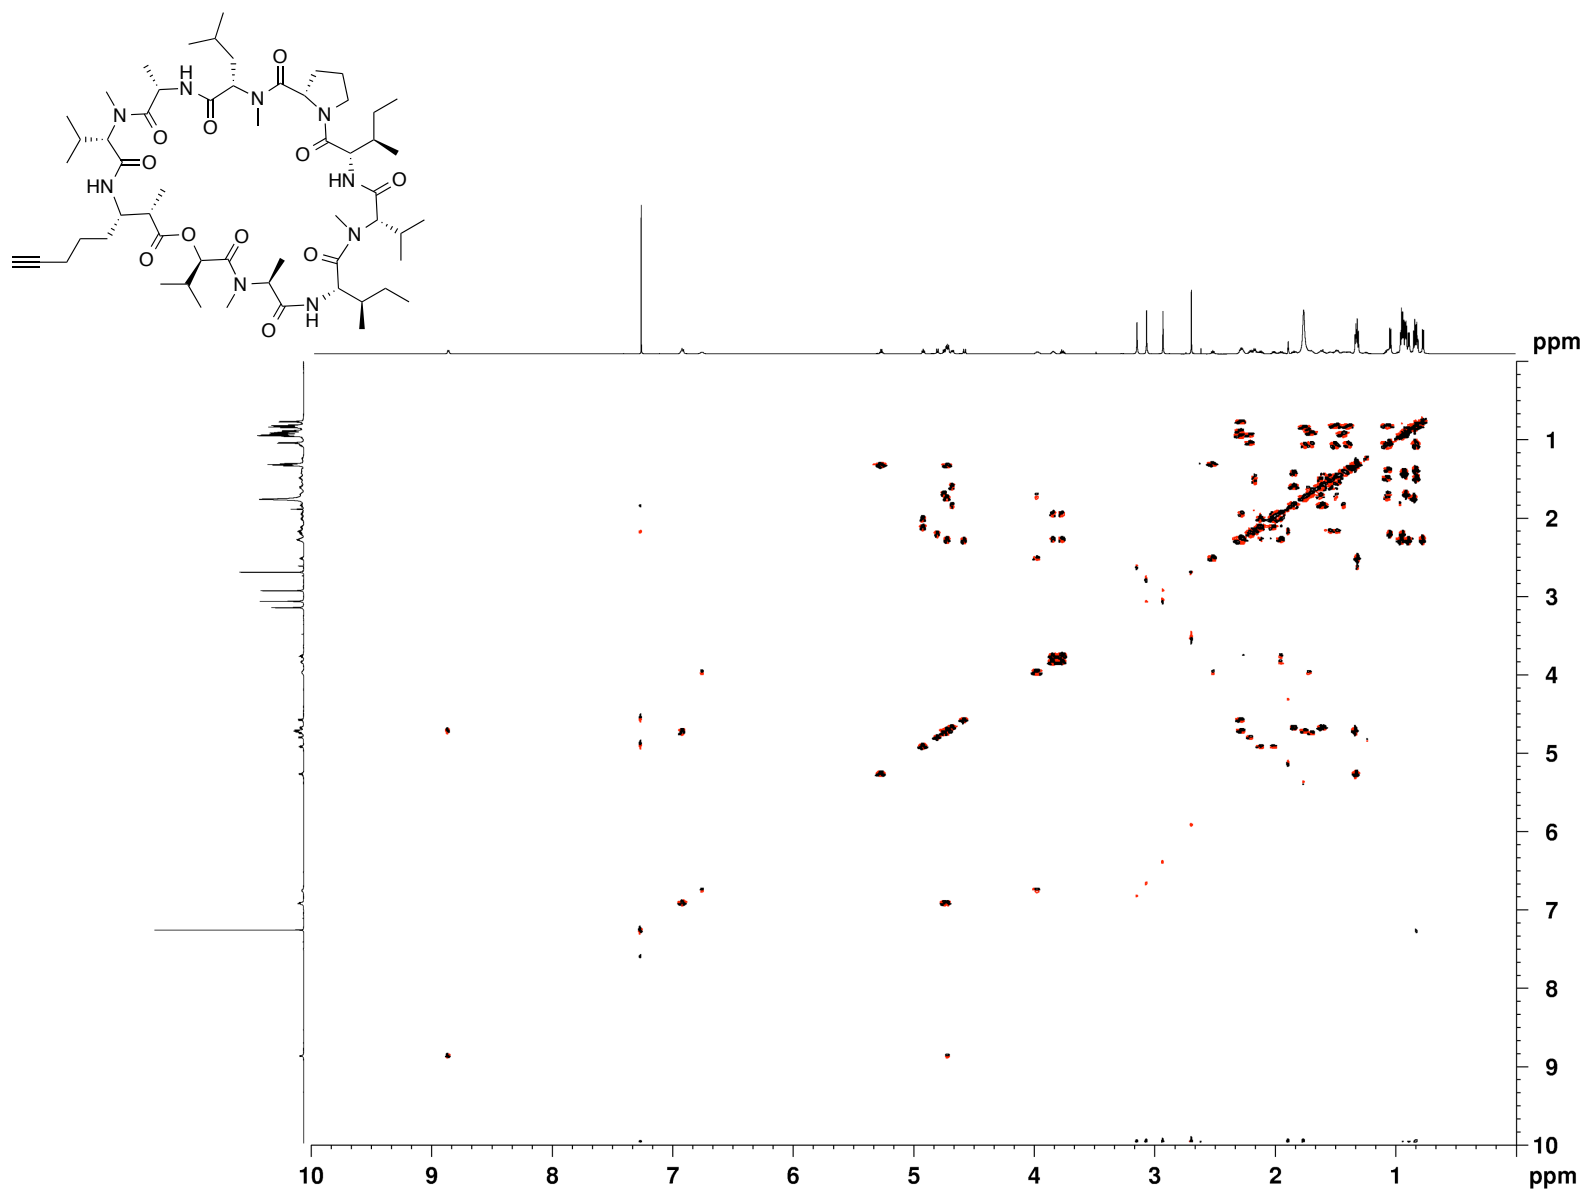

**Figure S5.** DQF COSY spectrum for companeramide A (1) in CDCl<sub>3</sub> (700 MHz)



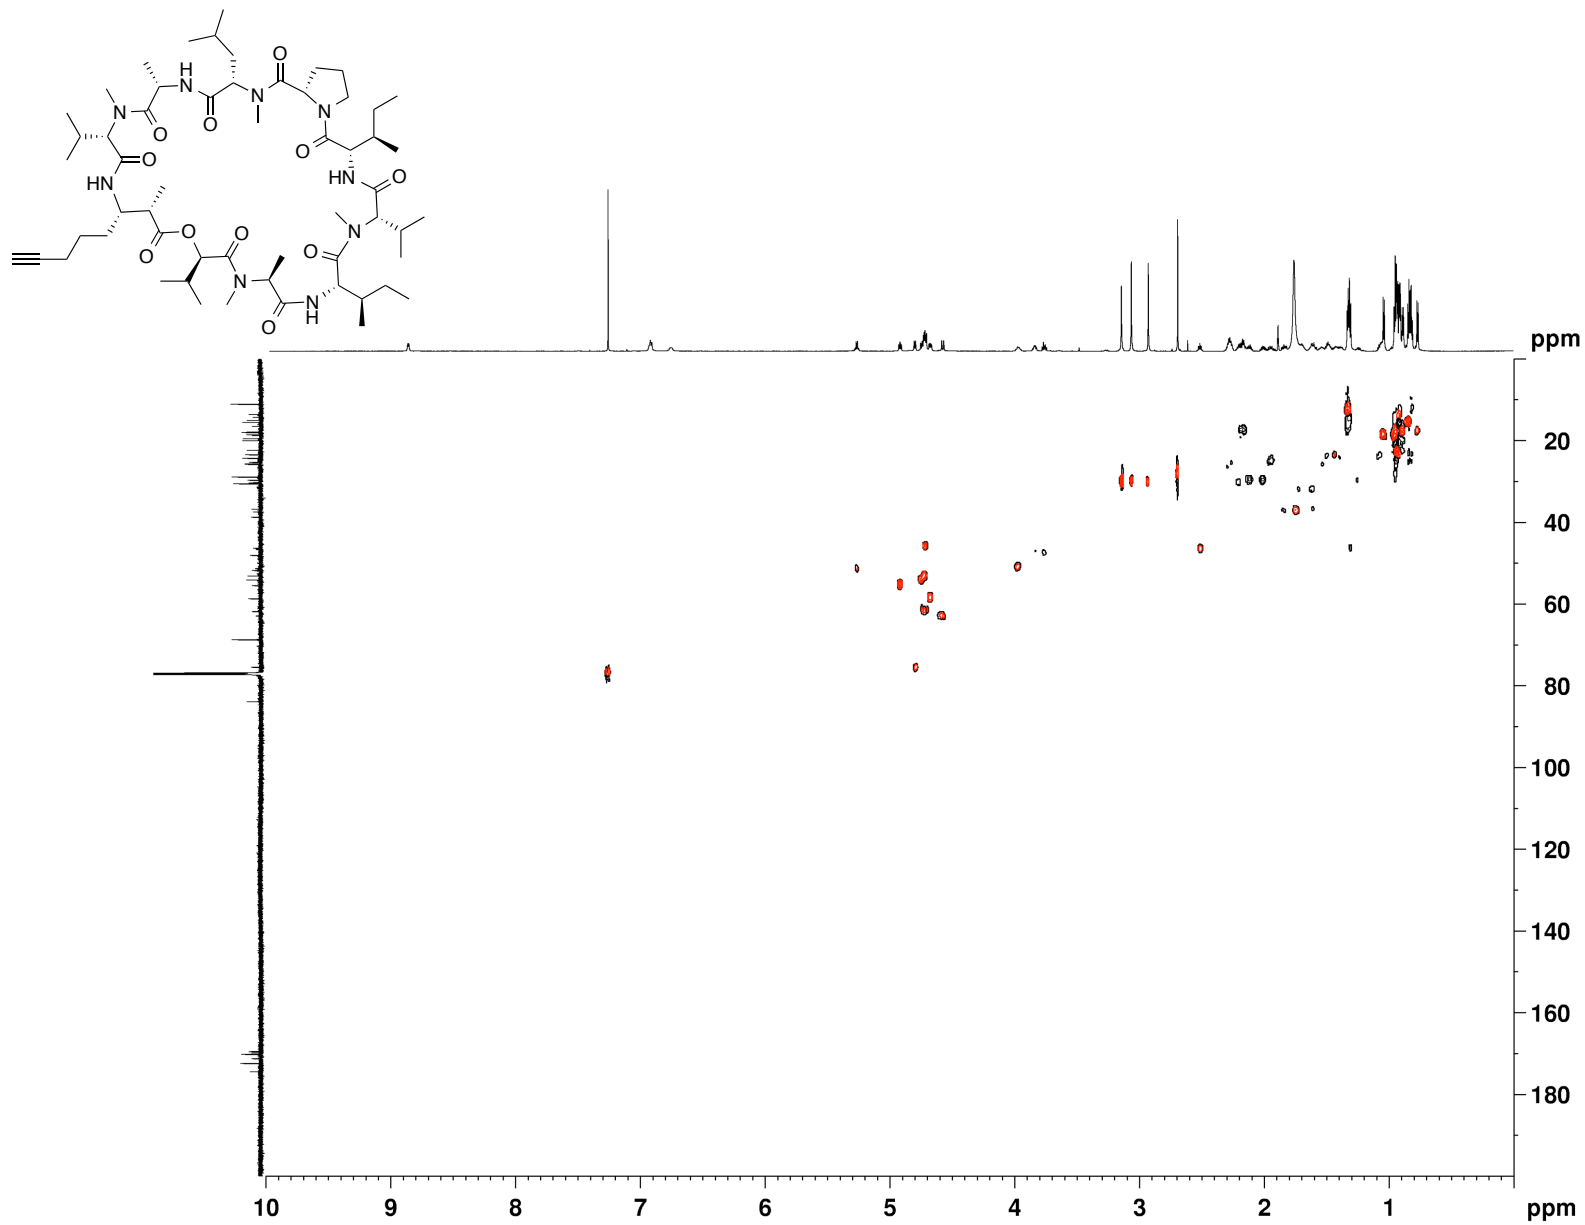

**Figure S6.** Multiplicity-edited HSQC spectrum for companeramide A (**1**) in CDCl<sub>3</sub> (700 MHz)

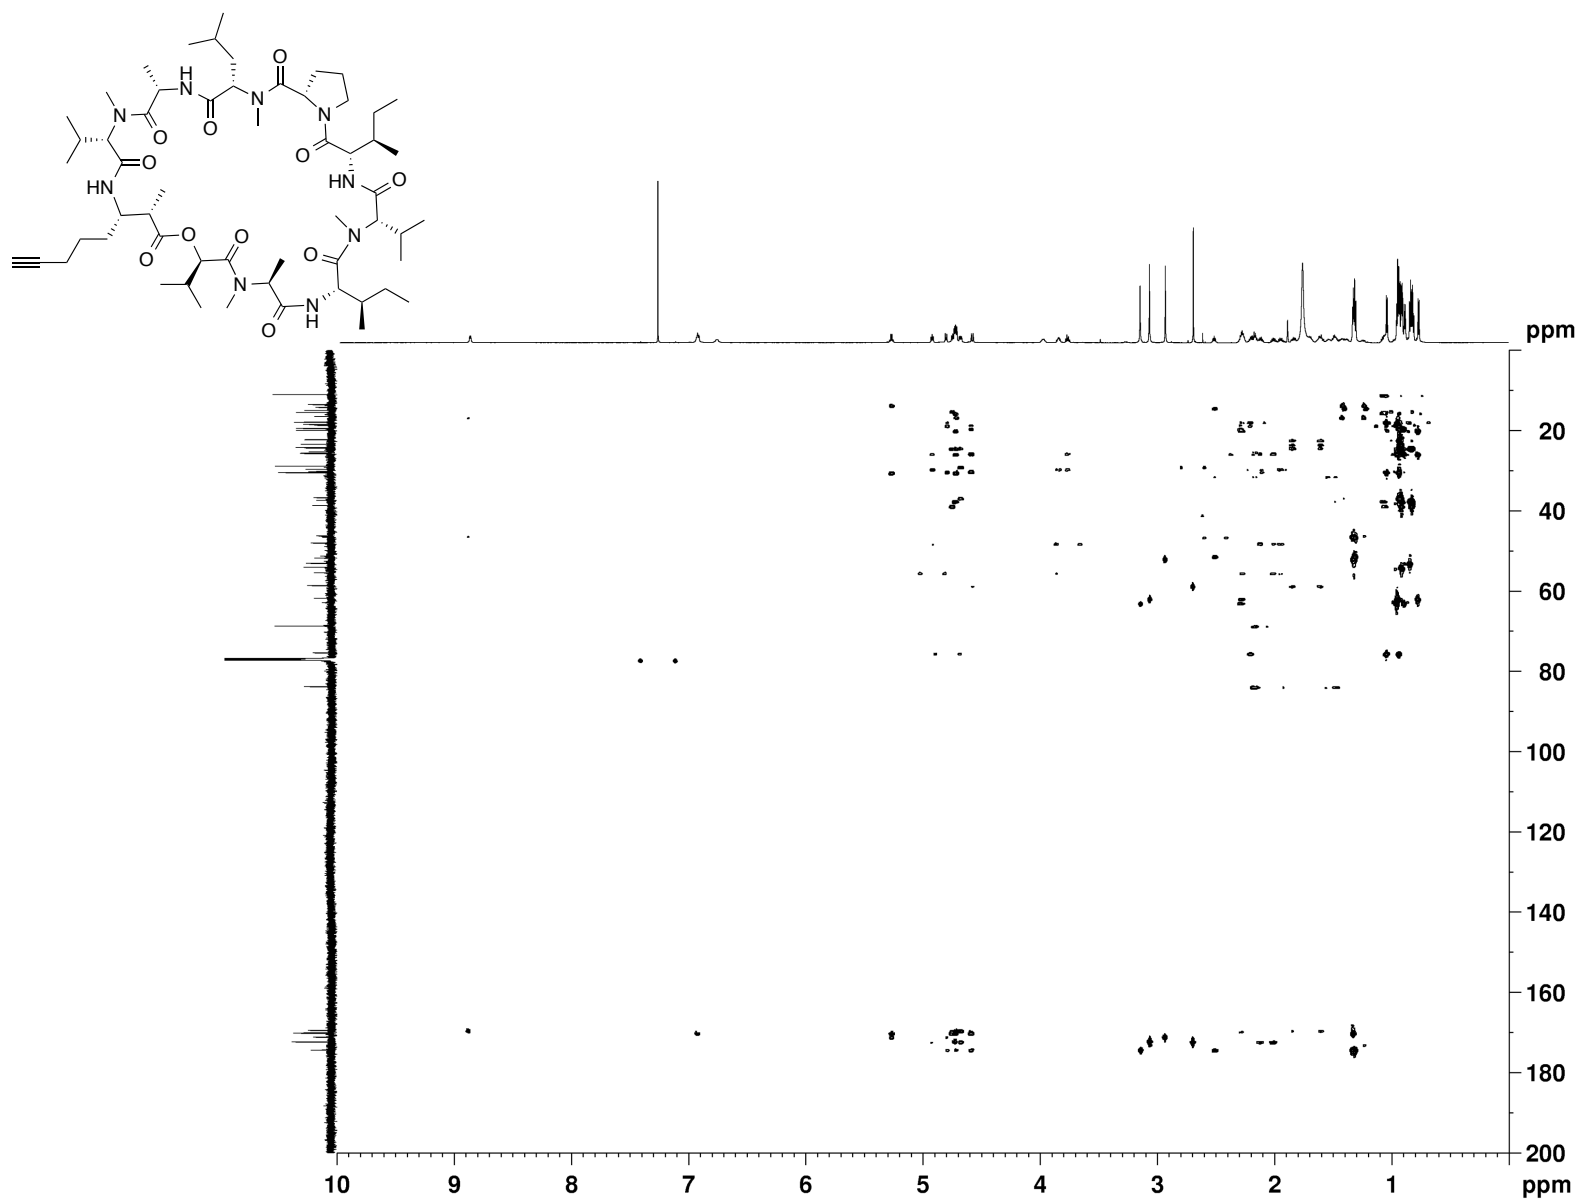

**Figure S7.** HMBC spectrum for companeramide A (1) in CDCl<sub>3</sub> (700 MHz)

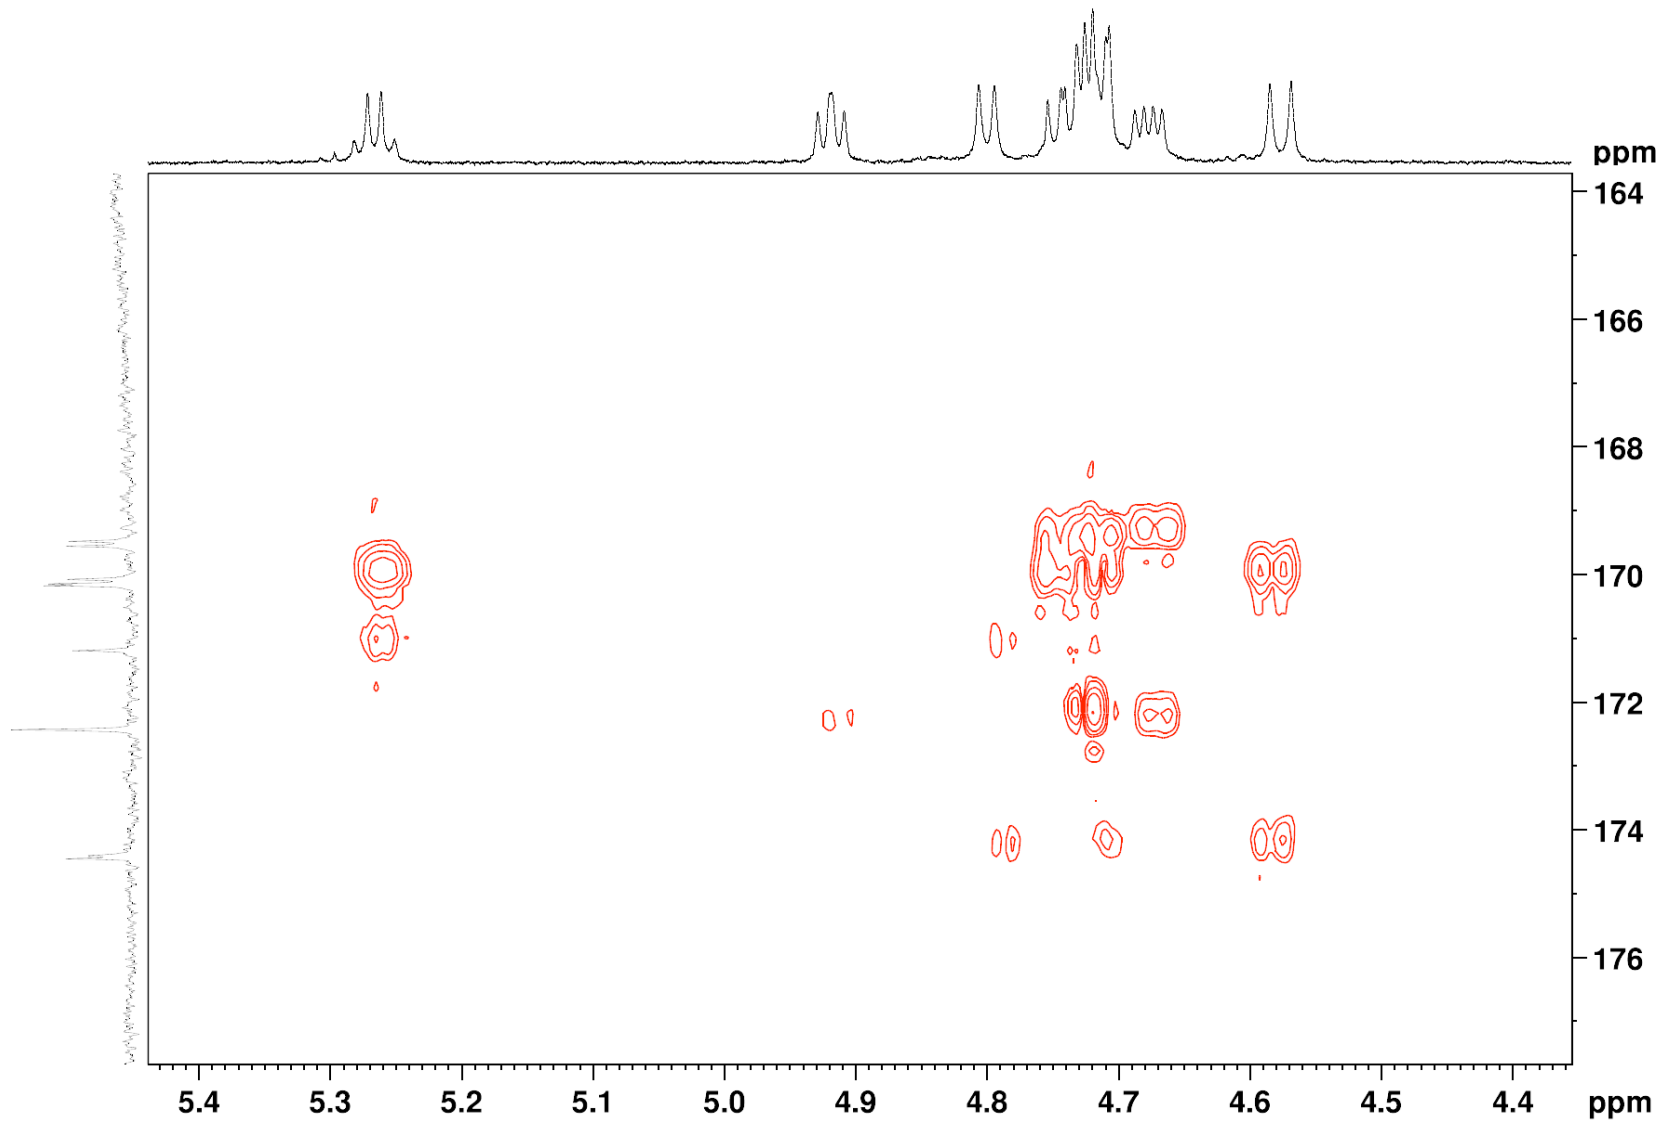

**Figure S7A.** Expanded partial HMBC spectrum for companeramide A (**1**) in CDCl<sub>3</sub> (700 MHz)

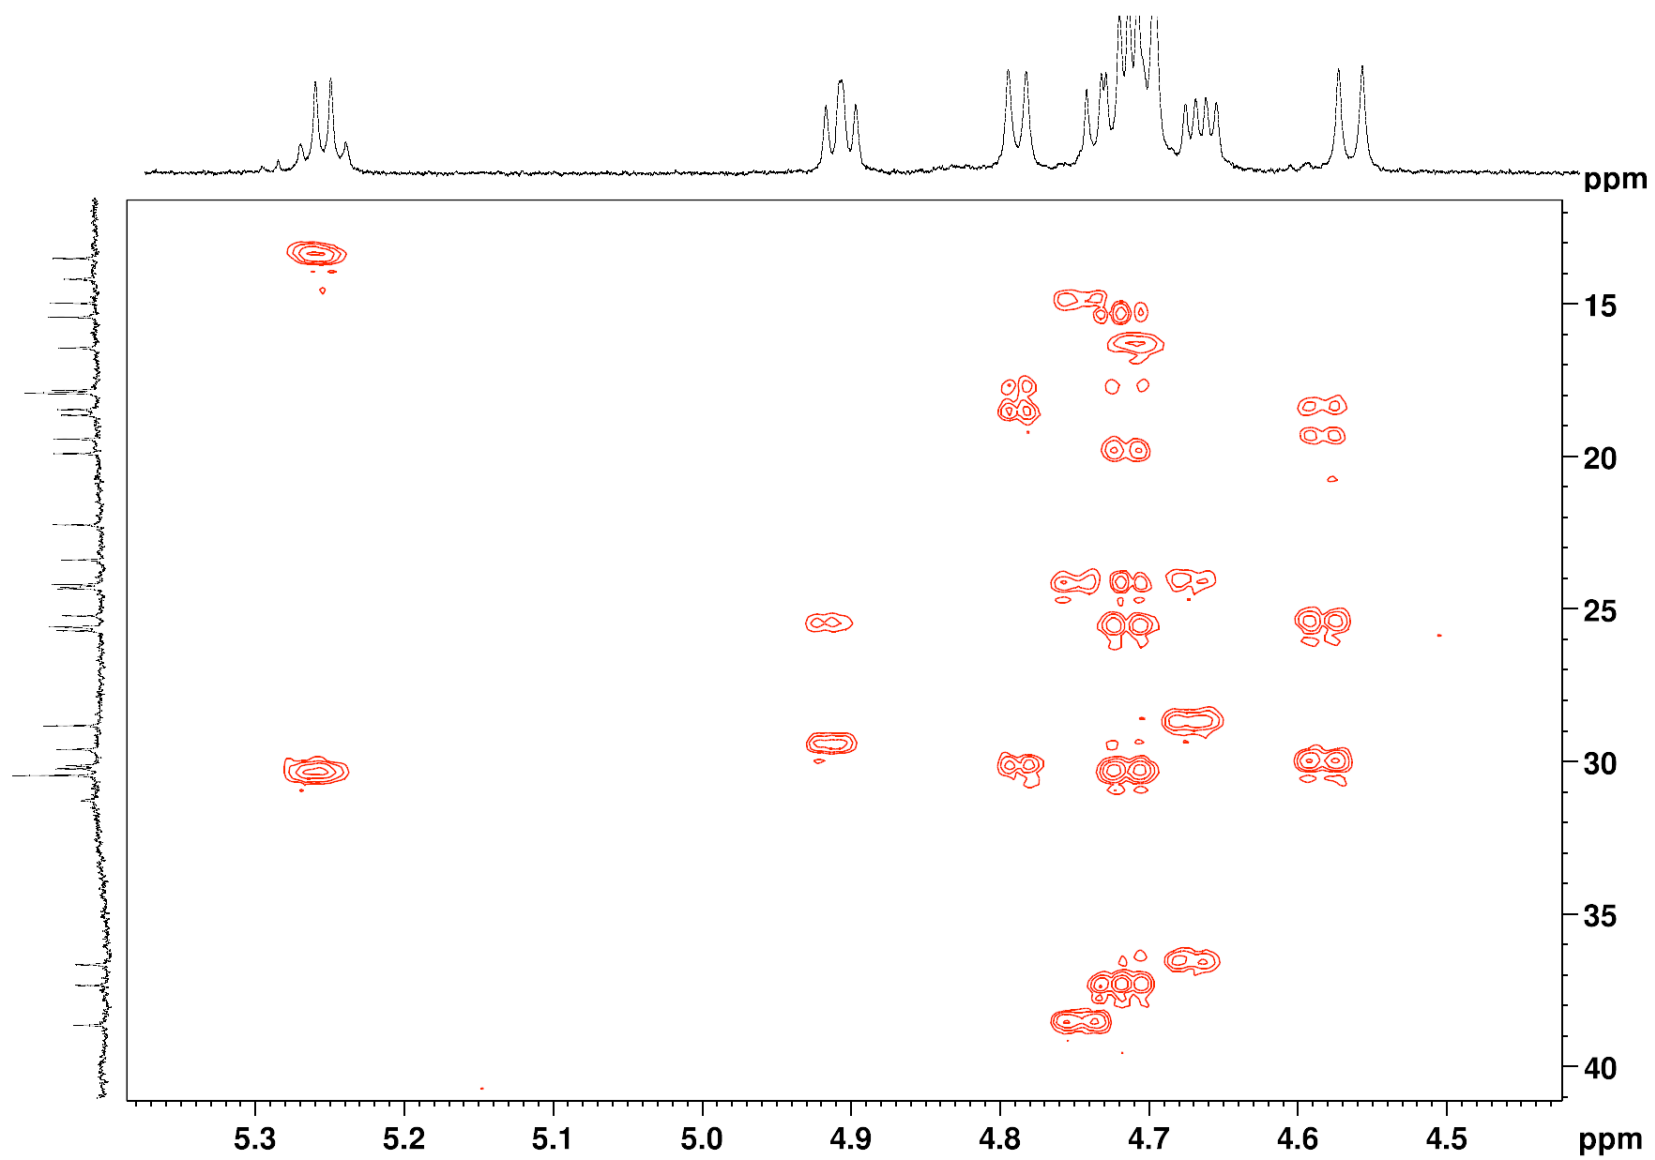

**Figure S7B.** Expanded partial HMBC spectrum for companeramide A (**1**) in CDCl<sub>3</sub> (700 MHz)

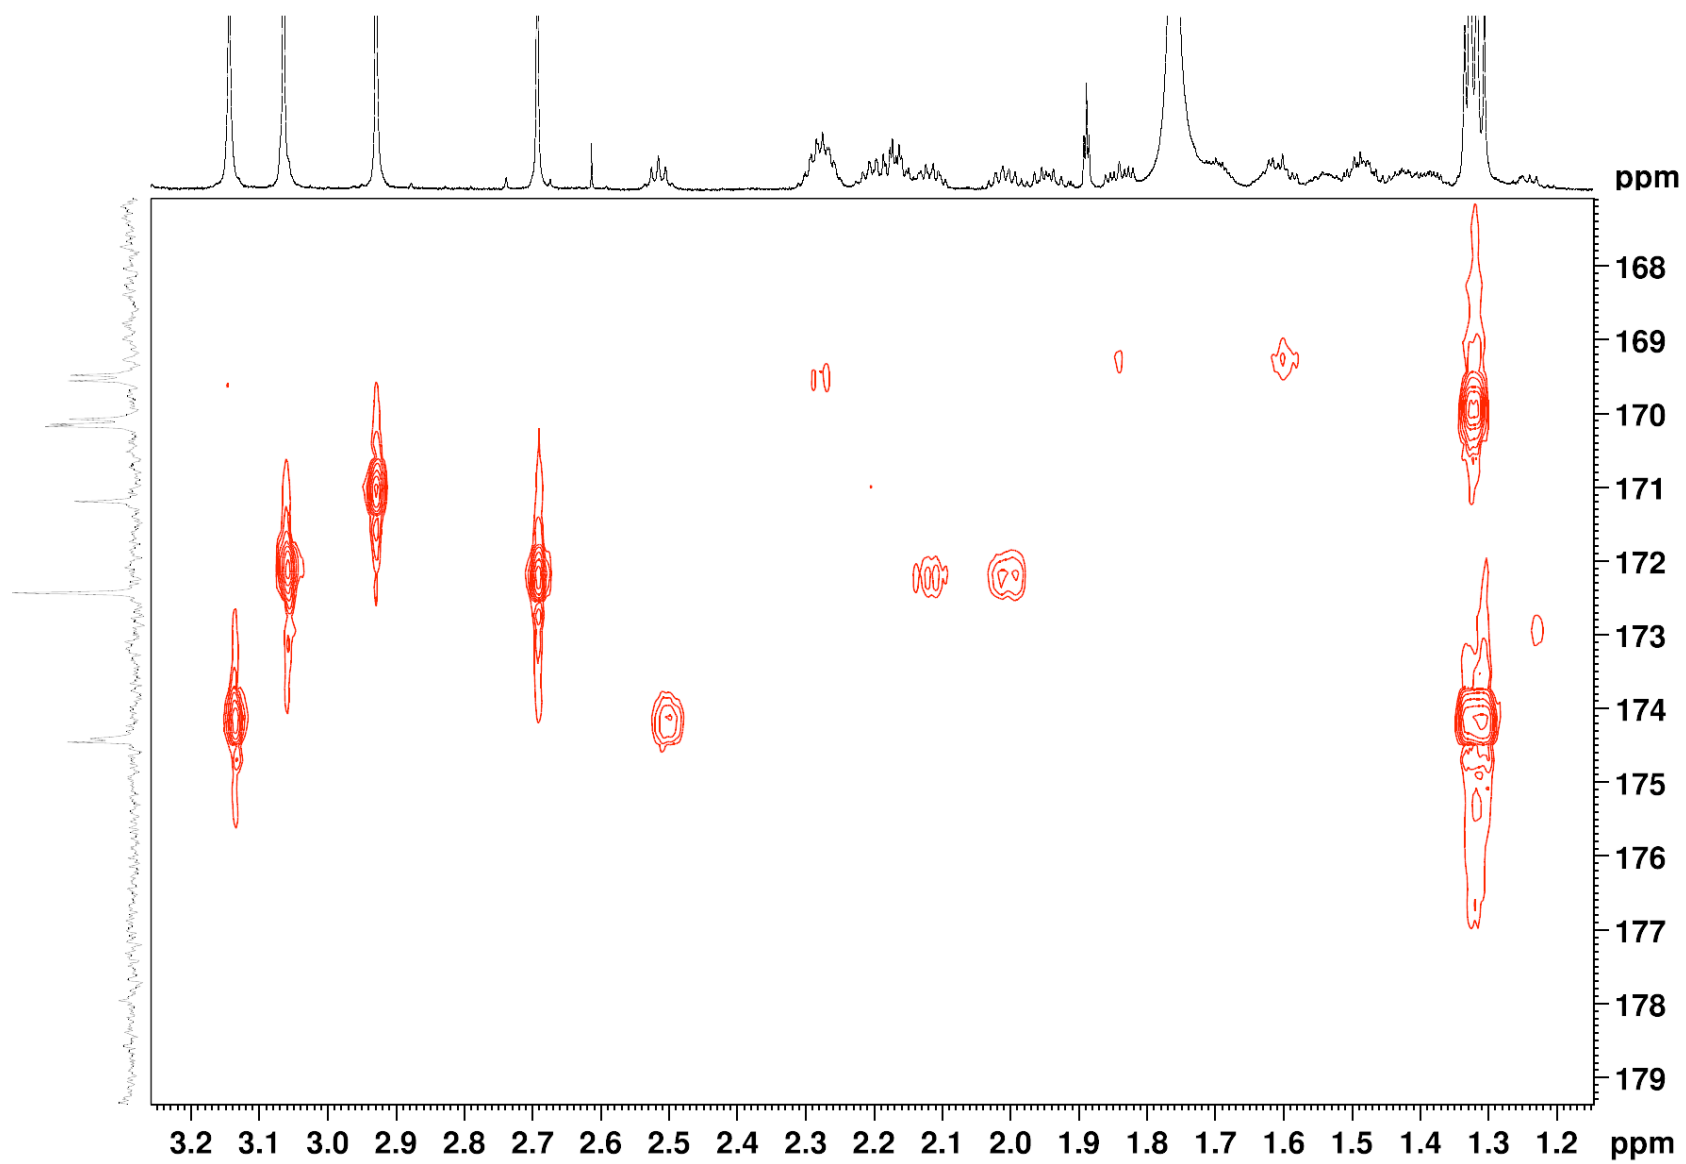

**Figure S7C.** Expanded partial HMBC spectrum for companeramide A (**1**) in  $\text{CDCl}_3$  (700 MHz)

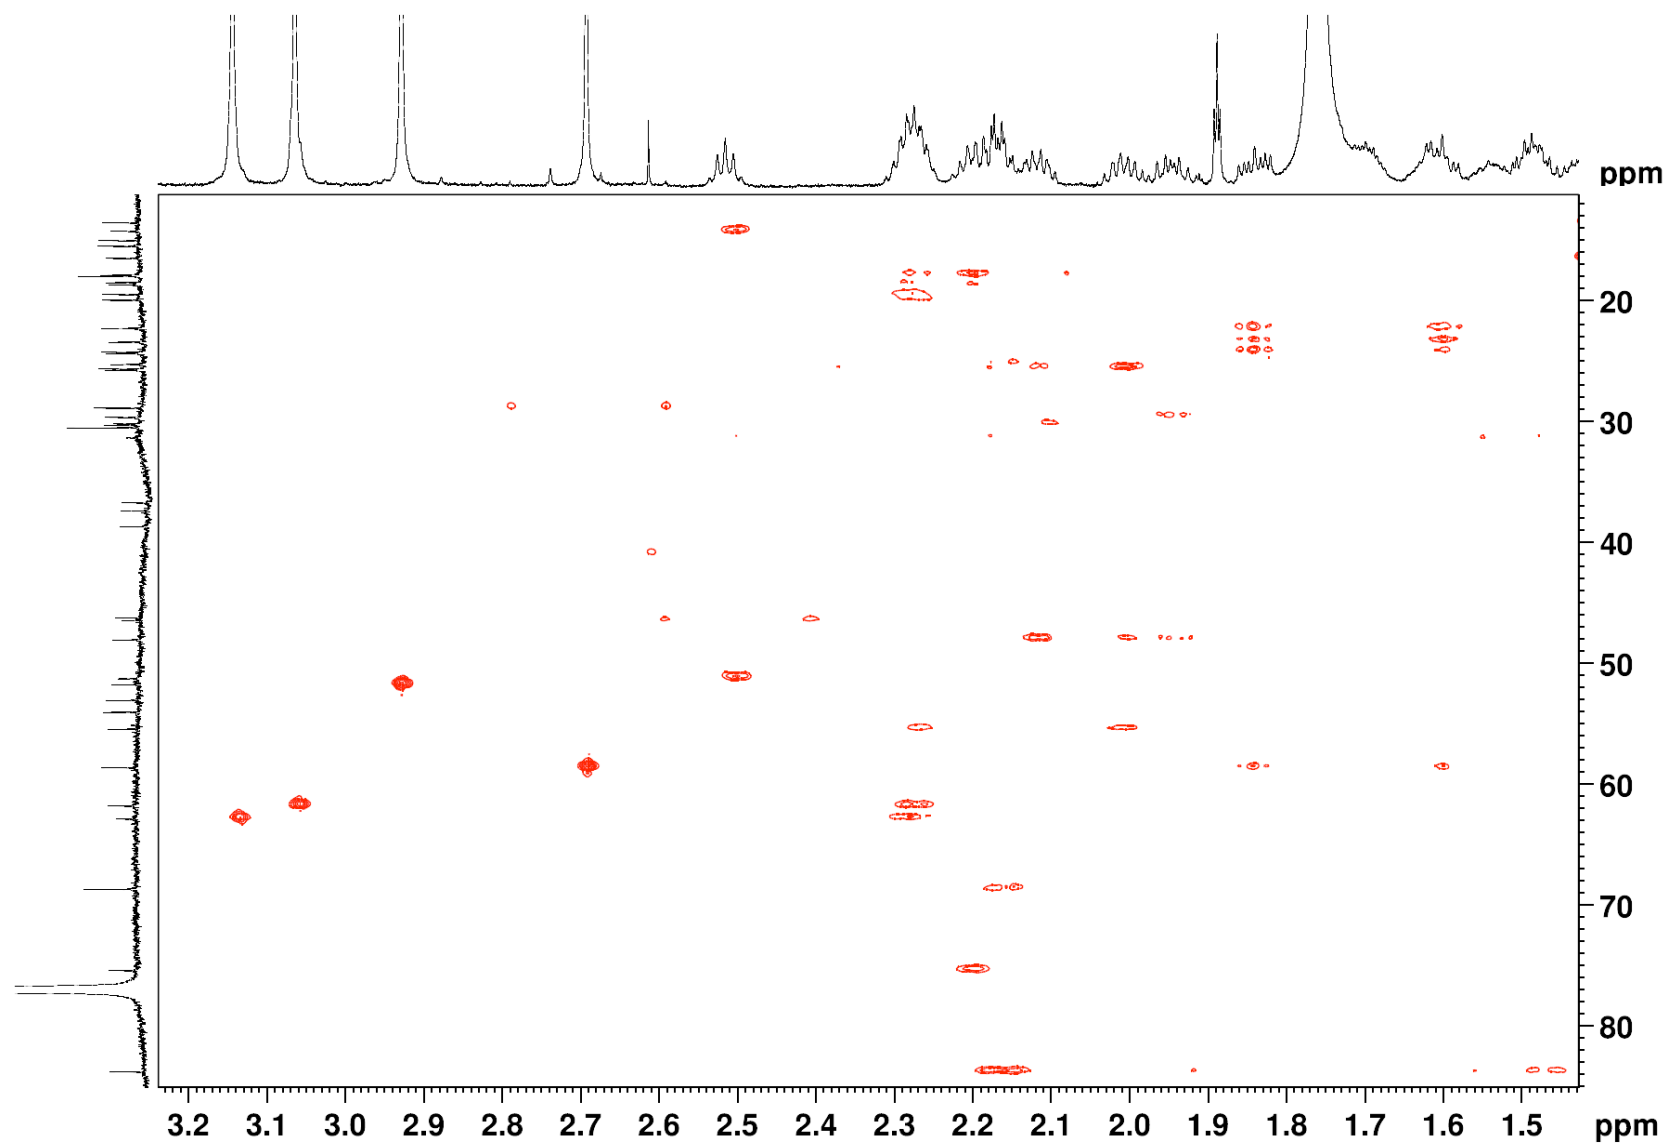

**Figure S7D.** Expanded partial HMBC spectrum for companeramide A (**1**) in  $\text{CDCl}_3$  (700 MHz)

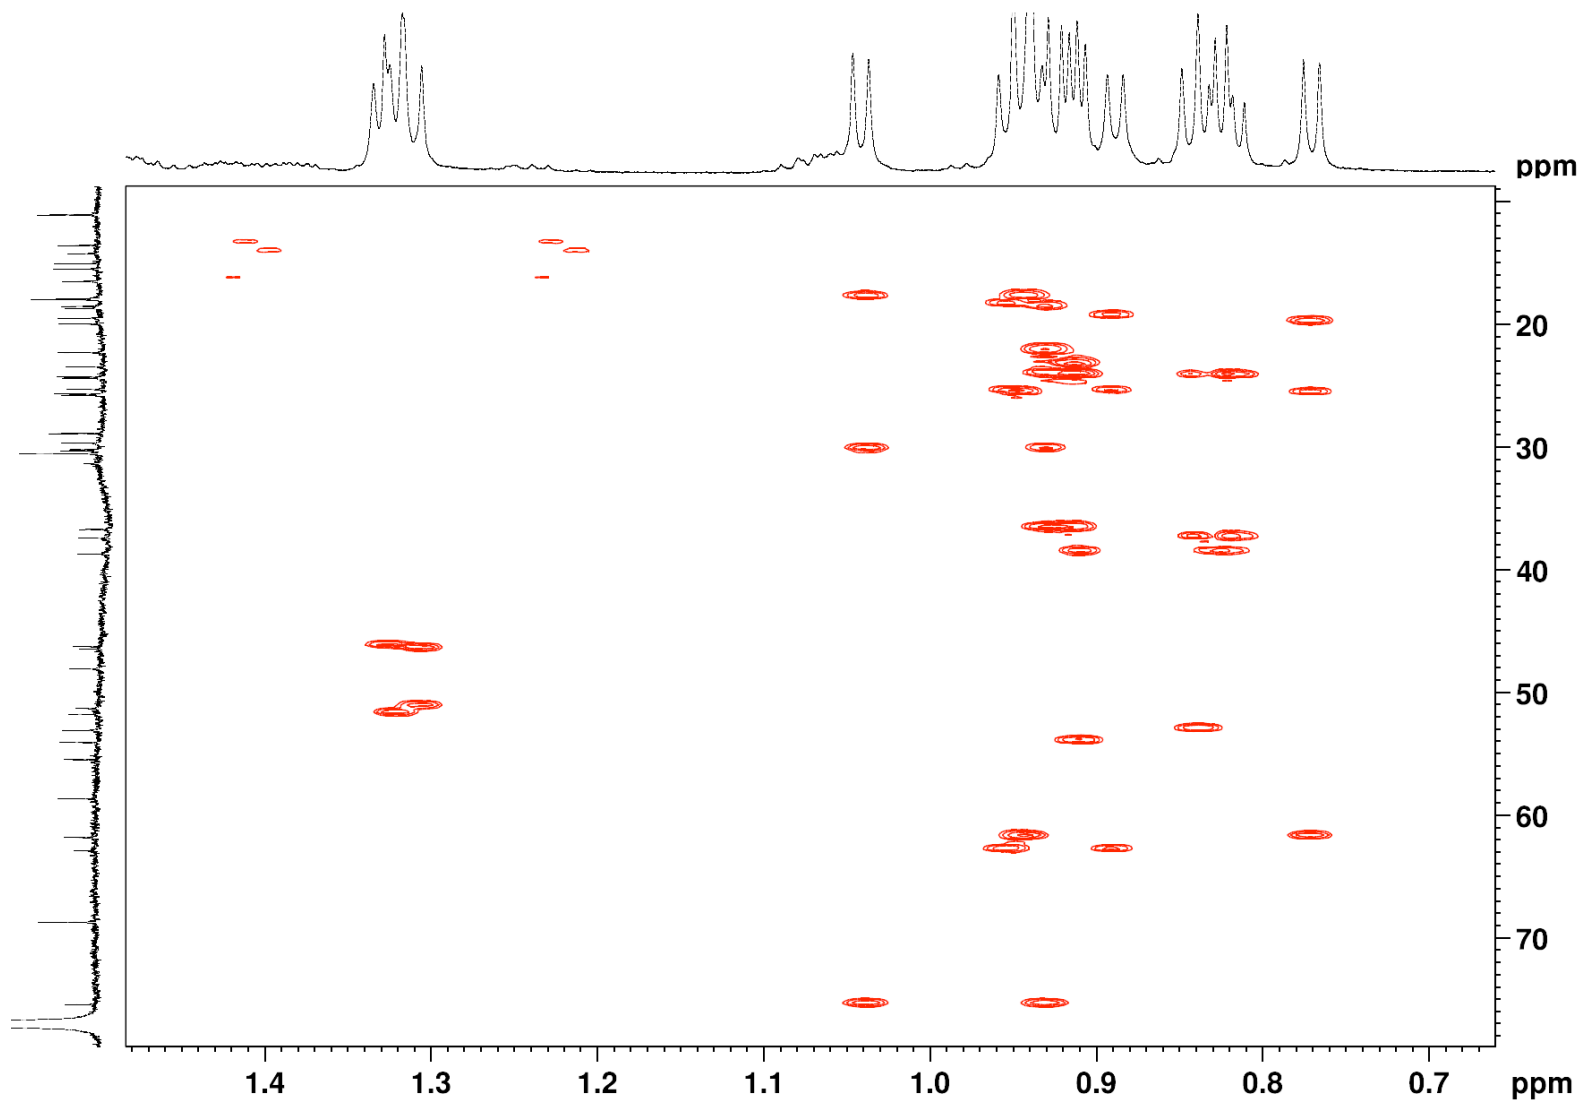

**Figure S7E.** Expanded partial HMBC spectrum for companeramide A (1) in CDCl<sub>3</sub> (700 MHz)

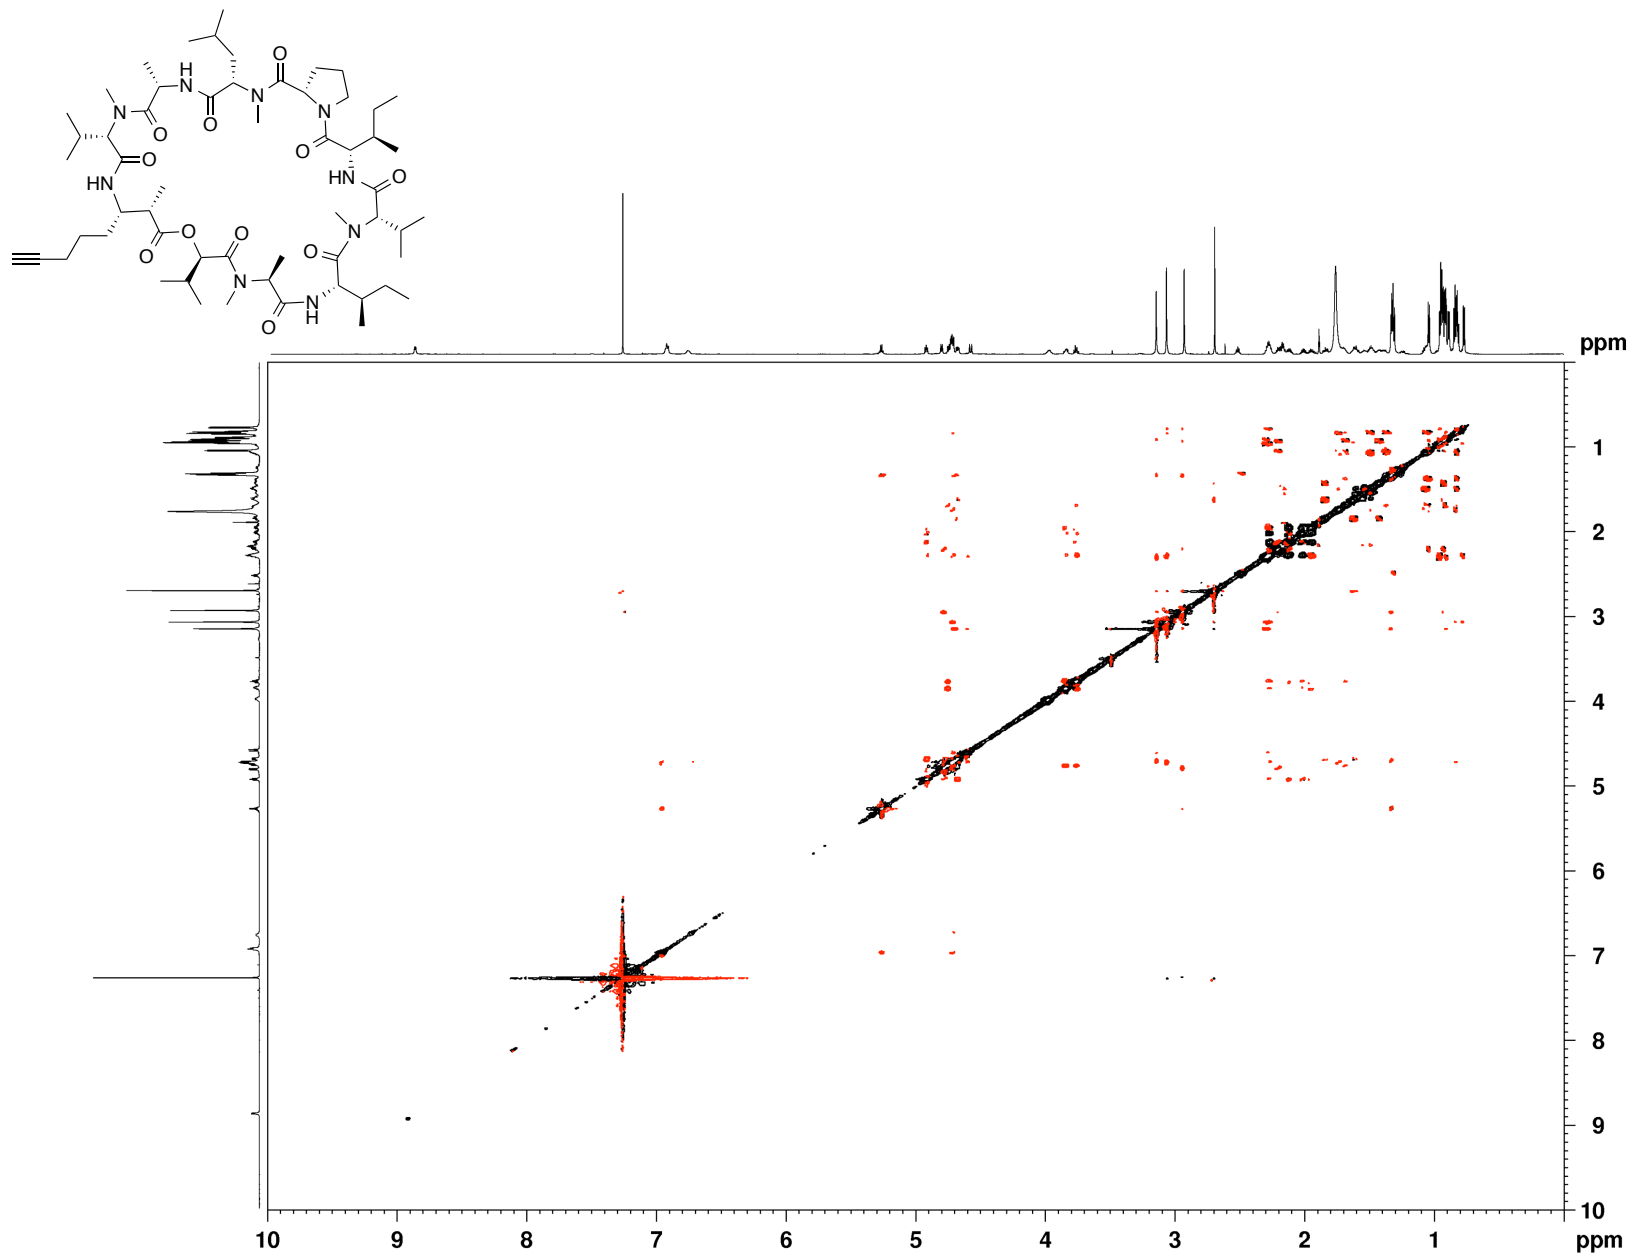

**Figure S8.** ROESY spectrum for companeramide A (**1**) in CDCl<sub>3</sub> (700 MHz)



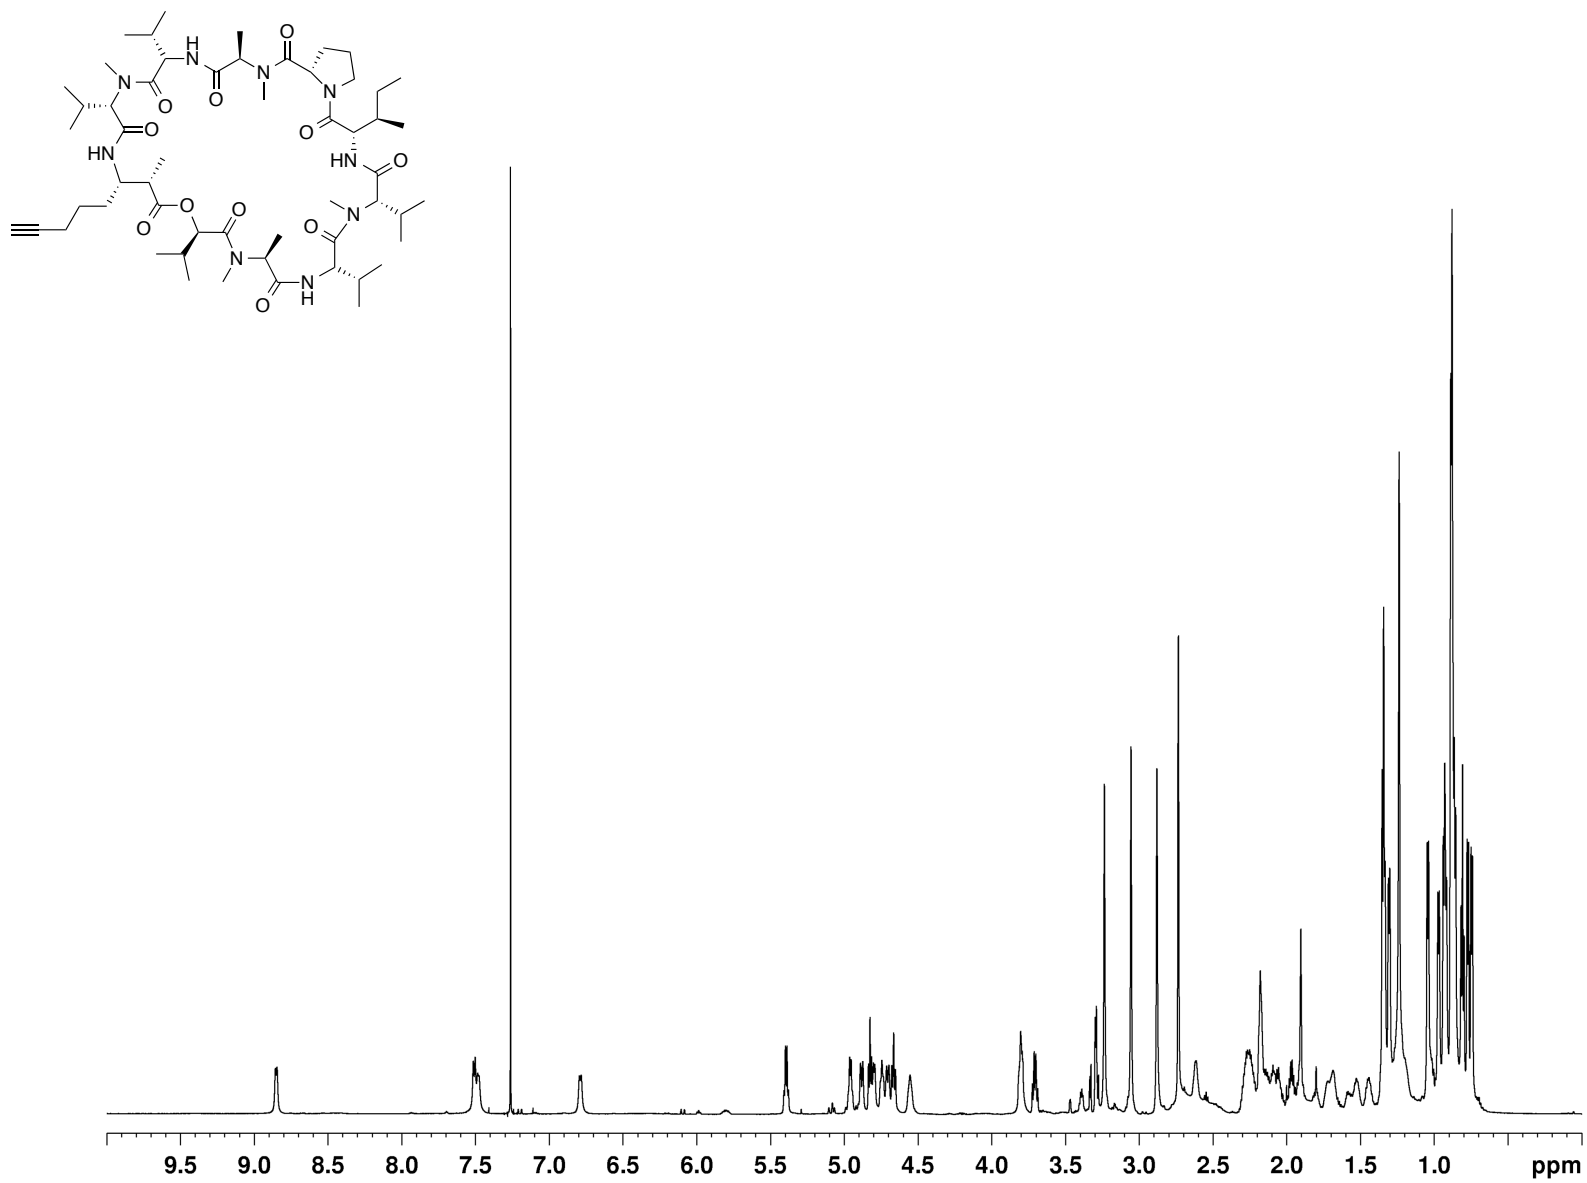

**Figure S9.** <sup>1</sup>H NMR spectrum for companeramide B (**2**) in CDCl<sub>3</sub> (700 MHz)

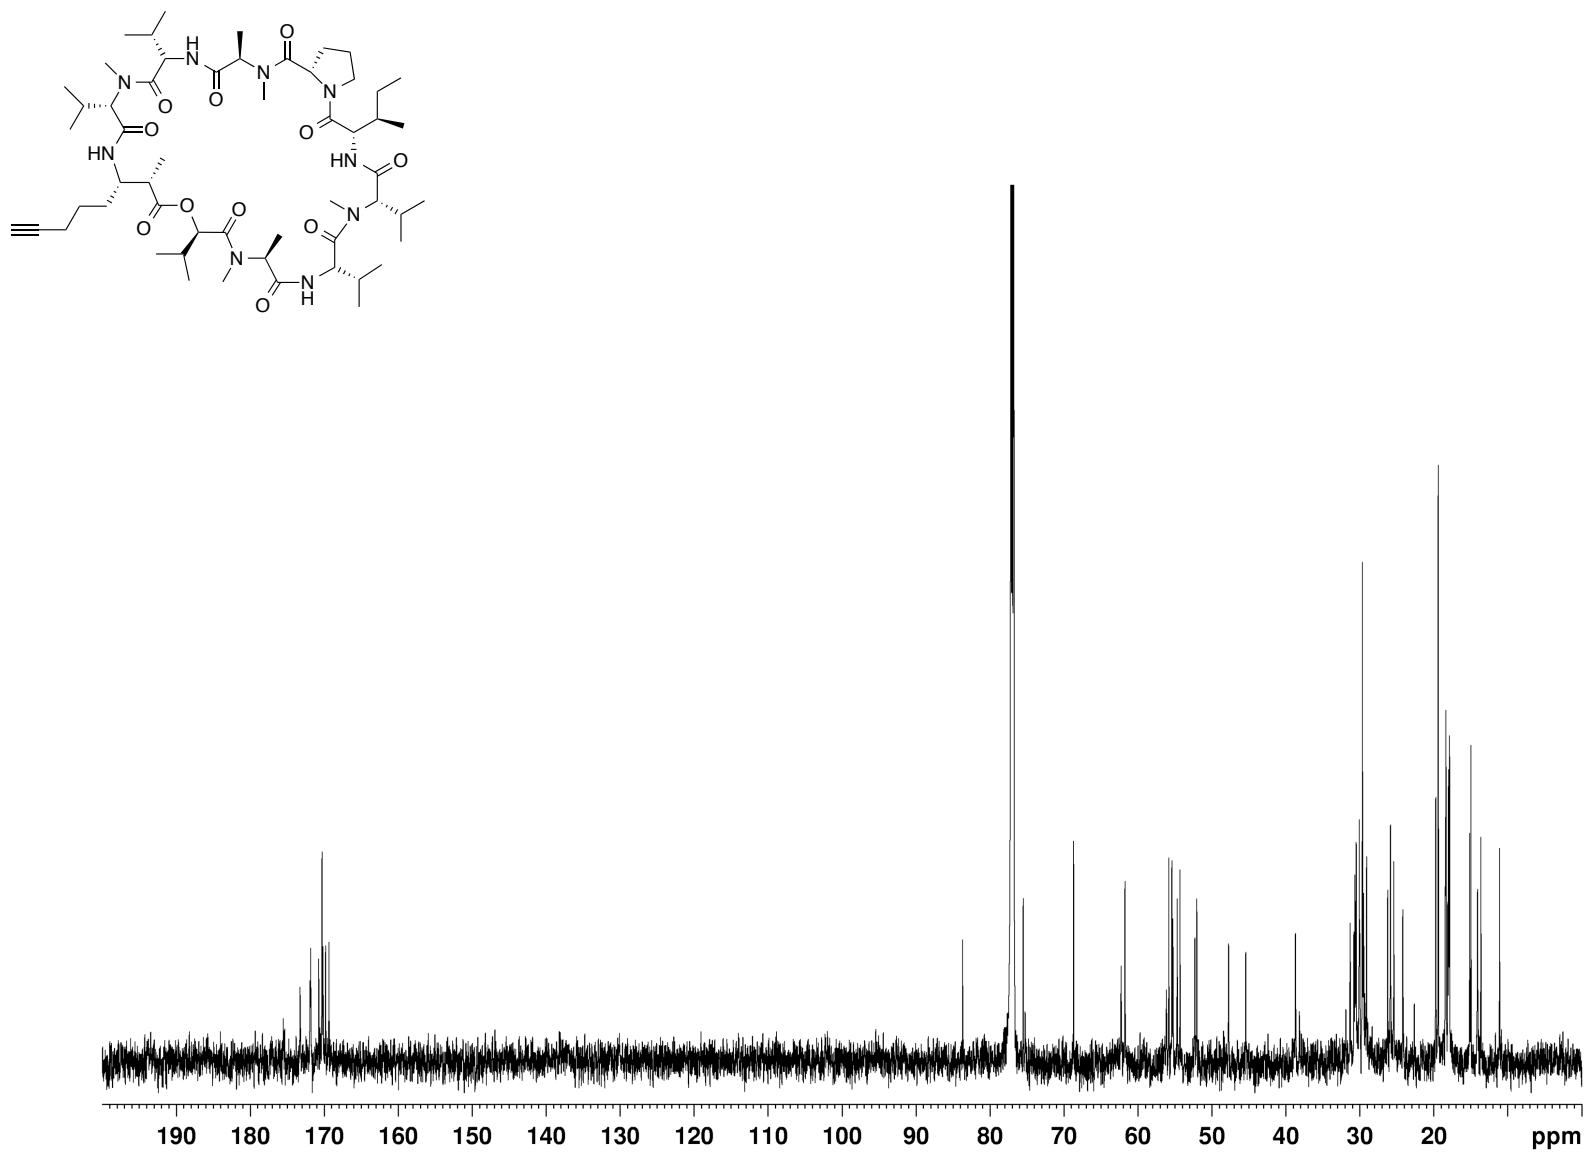

**Figure S10.** <sup>13</sup>C NMR spectrum for companeramide B (**2**) in CDCl<sub>3</sub> (175 MHz)

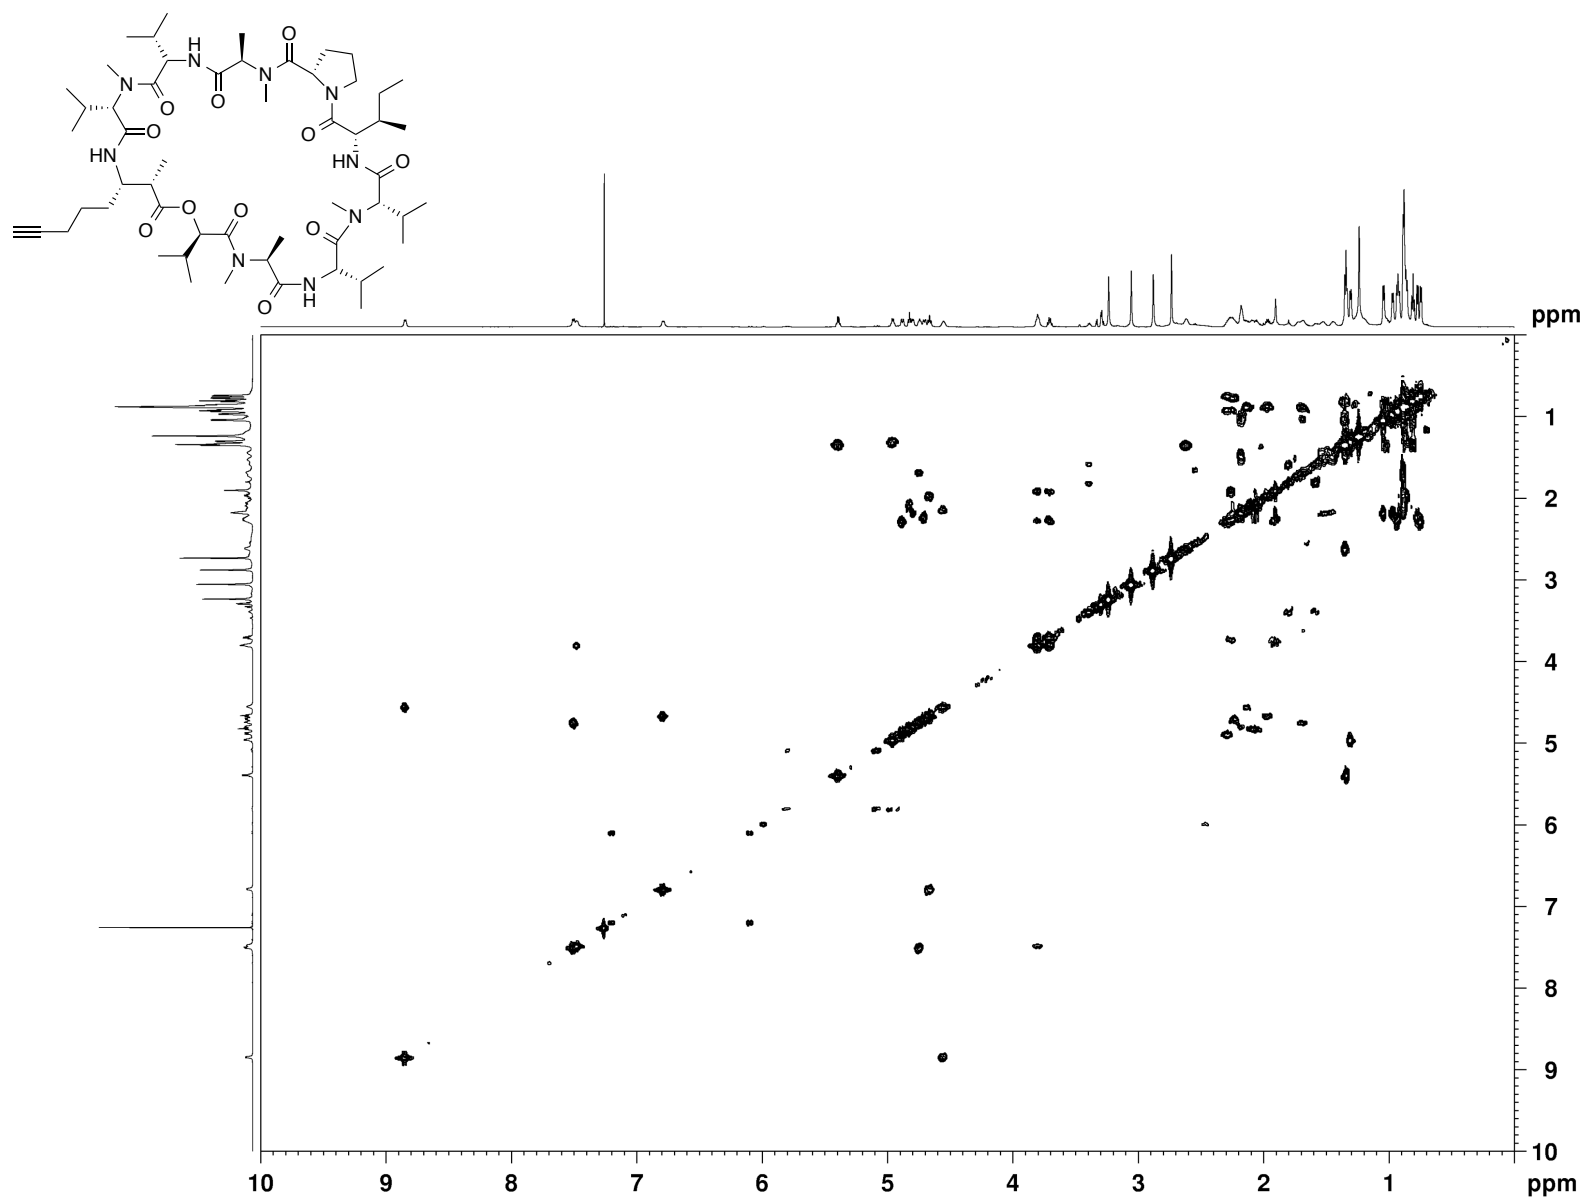

**Figure S11.** COSY spectrum for companeramide B (**2**) in CDCl<sub>3</sub> (700 MHz)

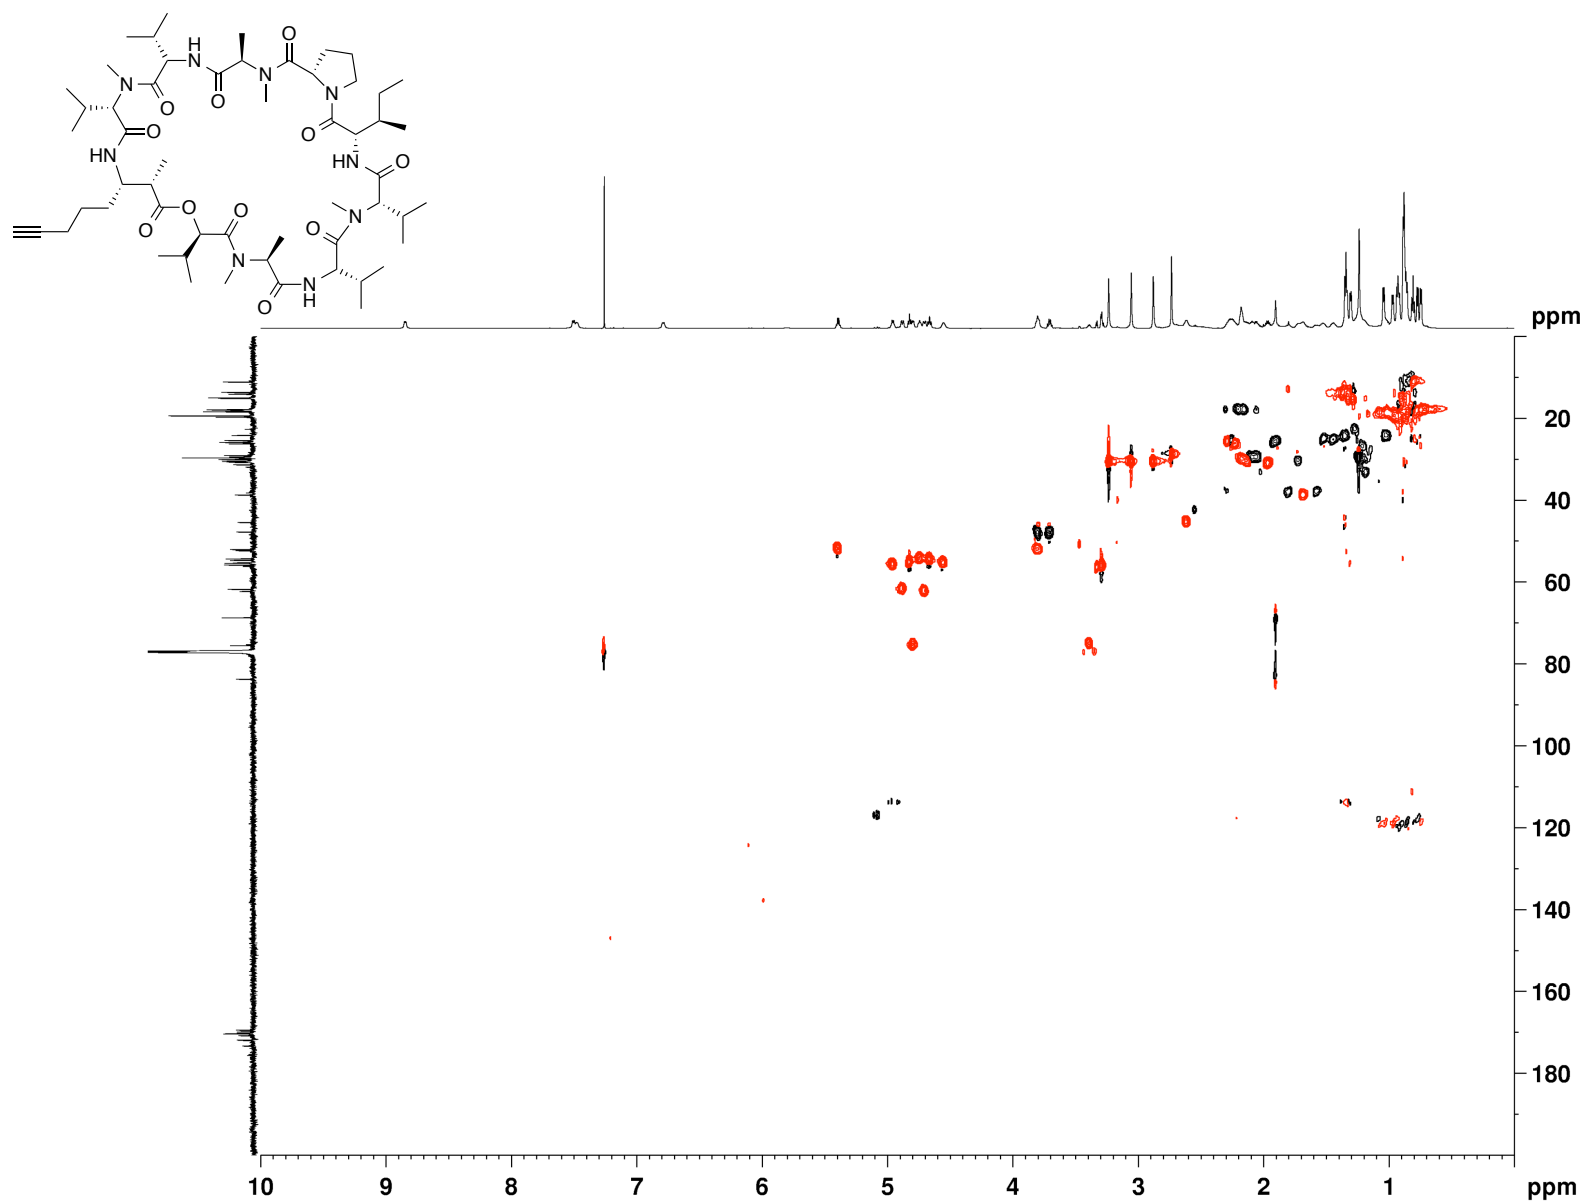

**Figure S12.** Multiplicity-edited HSQC spectrum for companeramide B (**2**) in CDCl<sub>3</sub> (700 MHz)

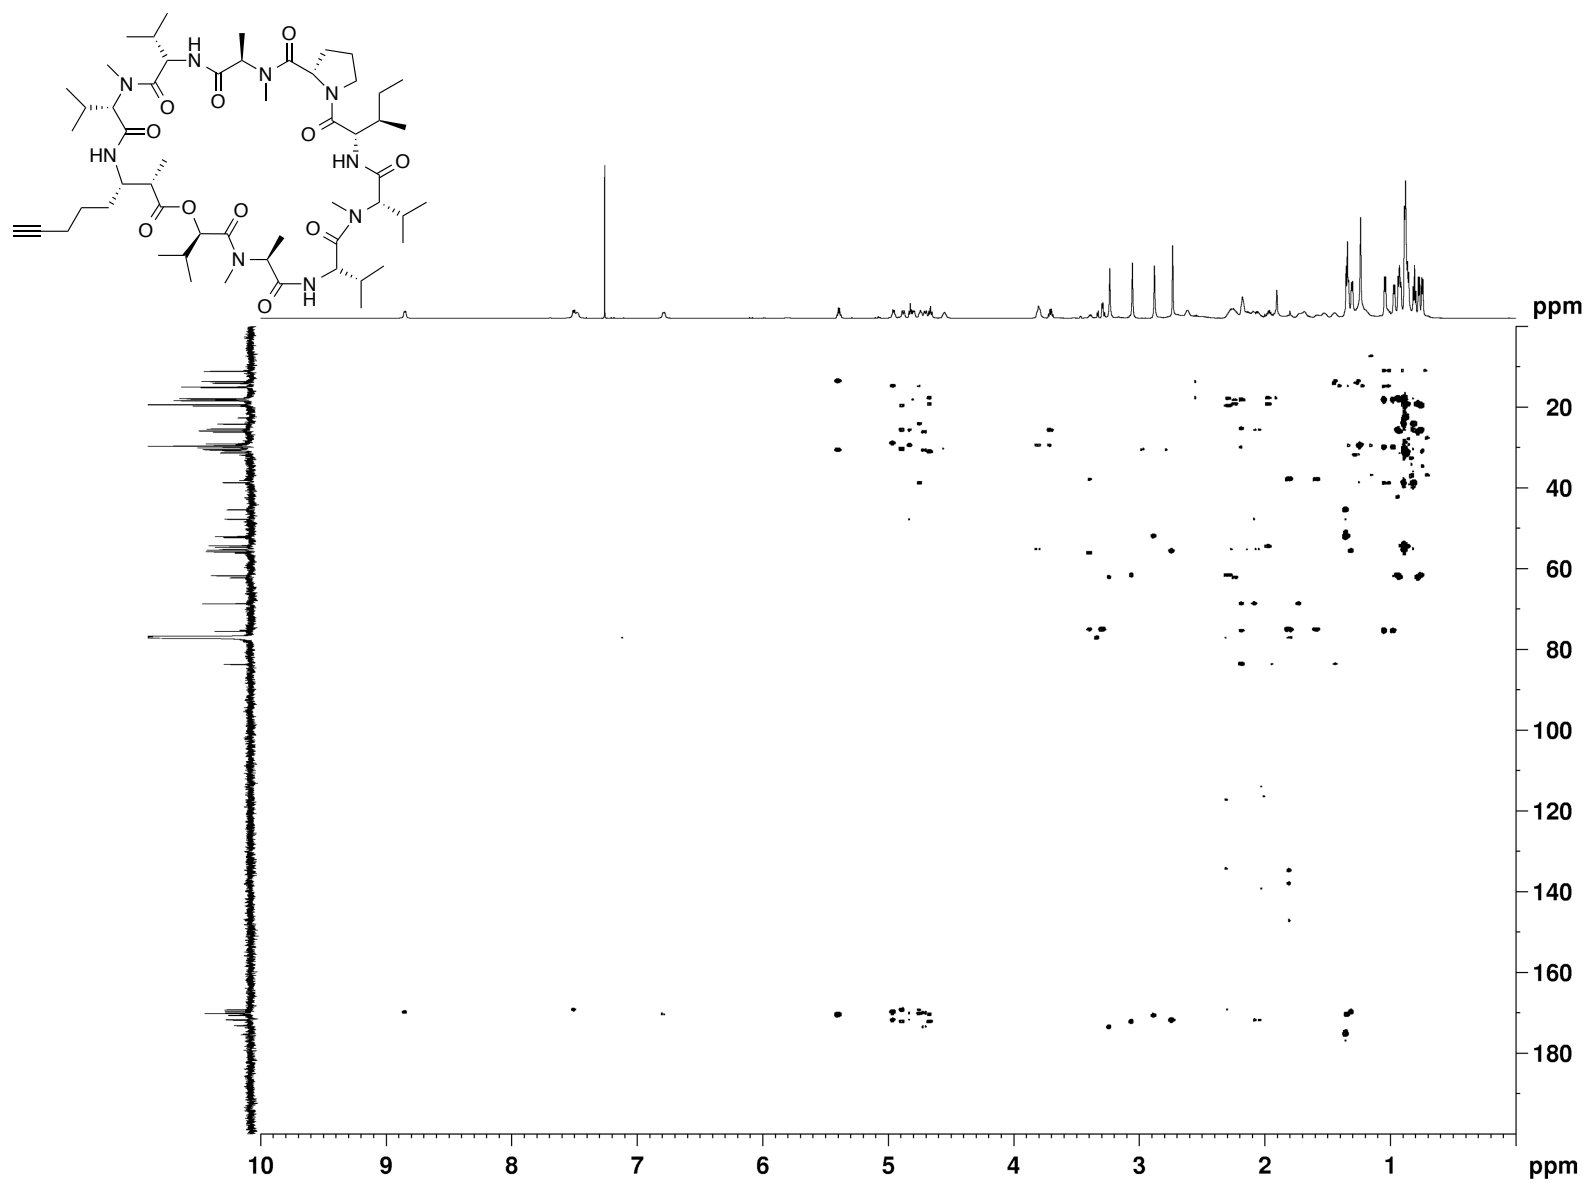

**Figure S13.** HMBC spectrum for companeramide B (**2**) in CDCl<sub>3</sub> (700 MHz)

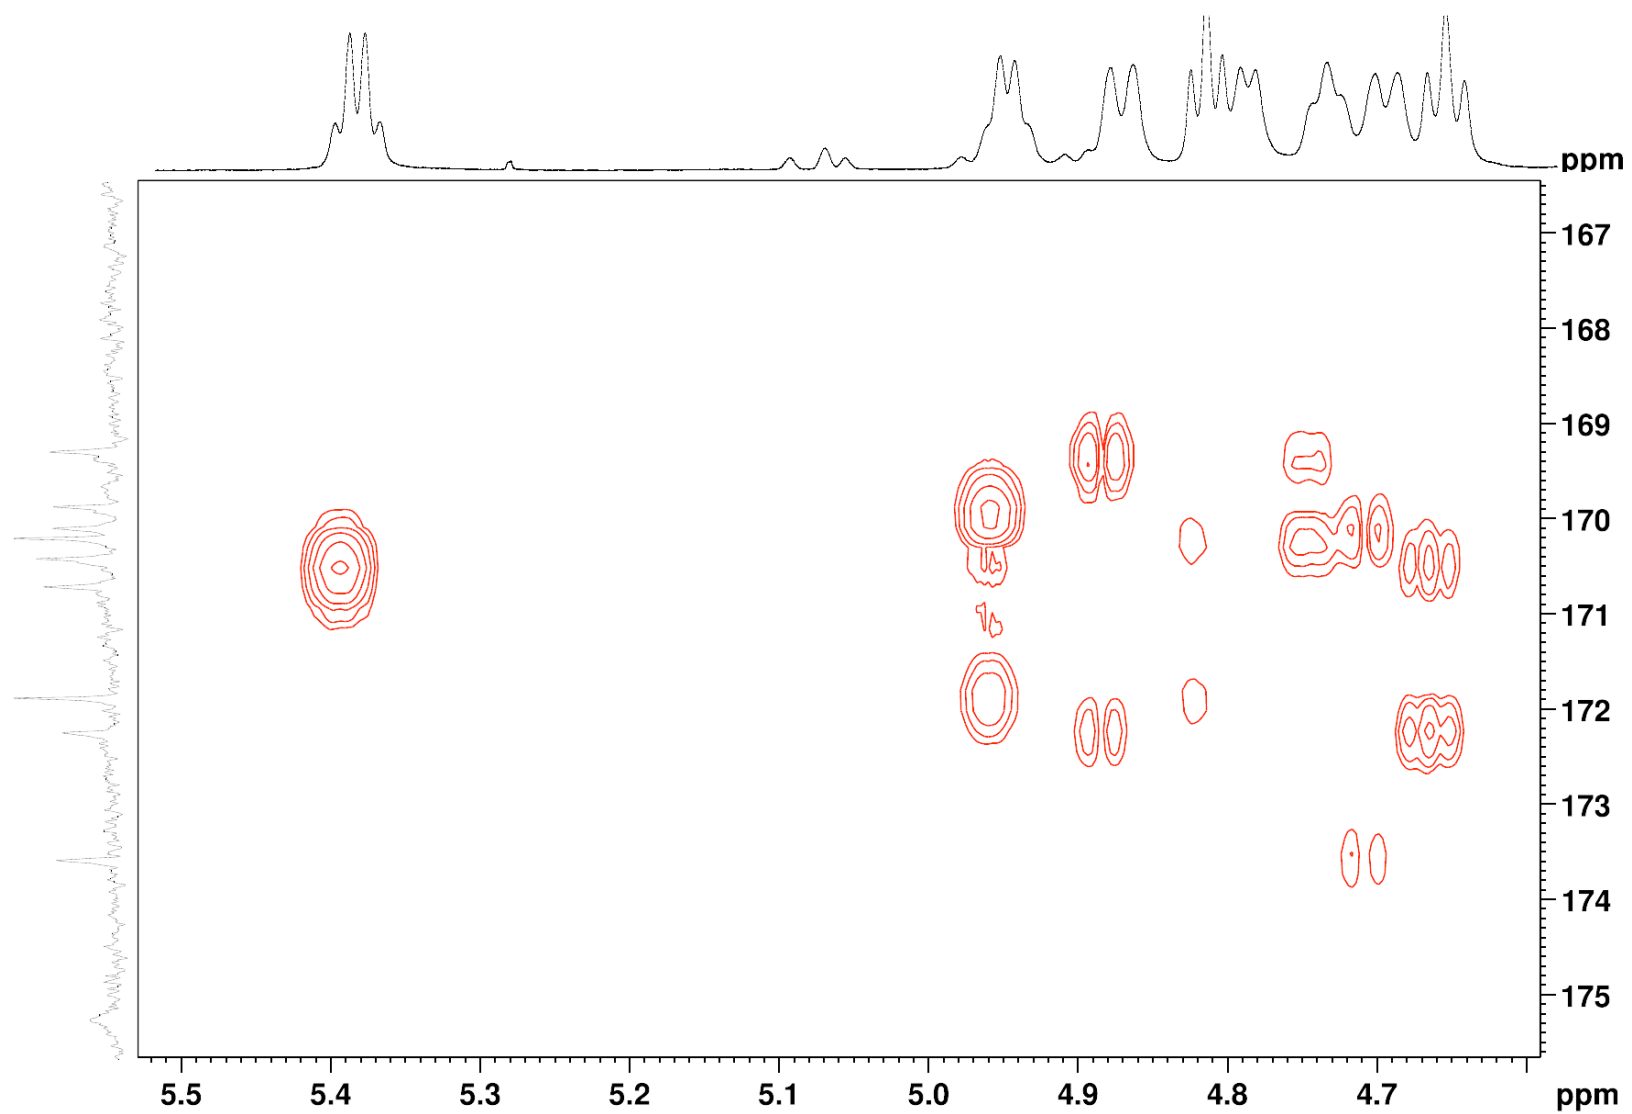

**Figure S13A.** Expanded partial HMBC spectrum for companeramide B (**2**) in  $\text{CDCl}_3$  (700 MHz)

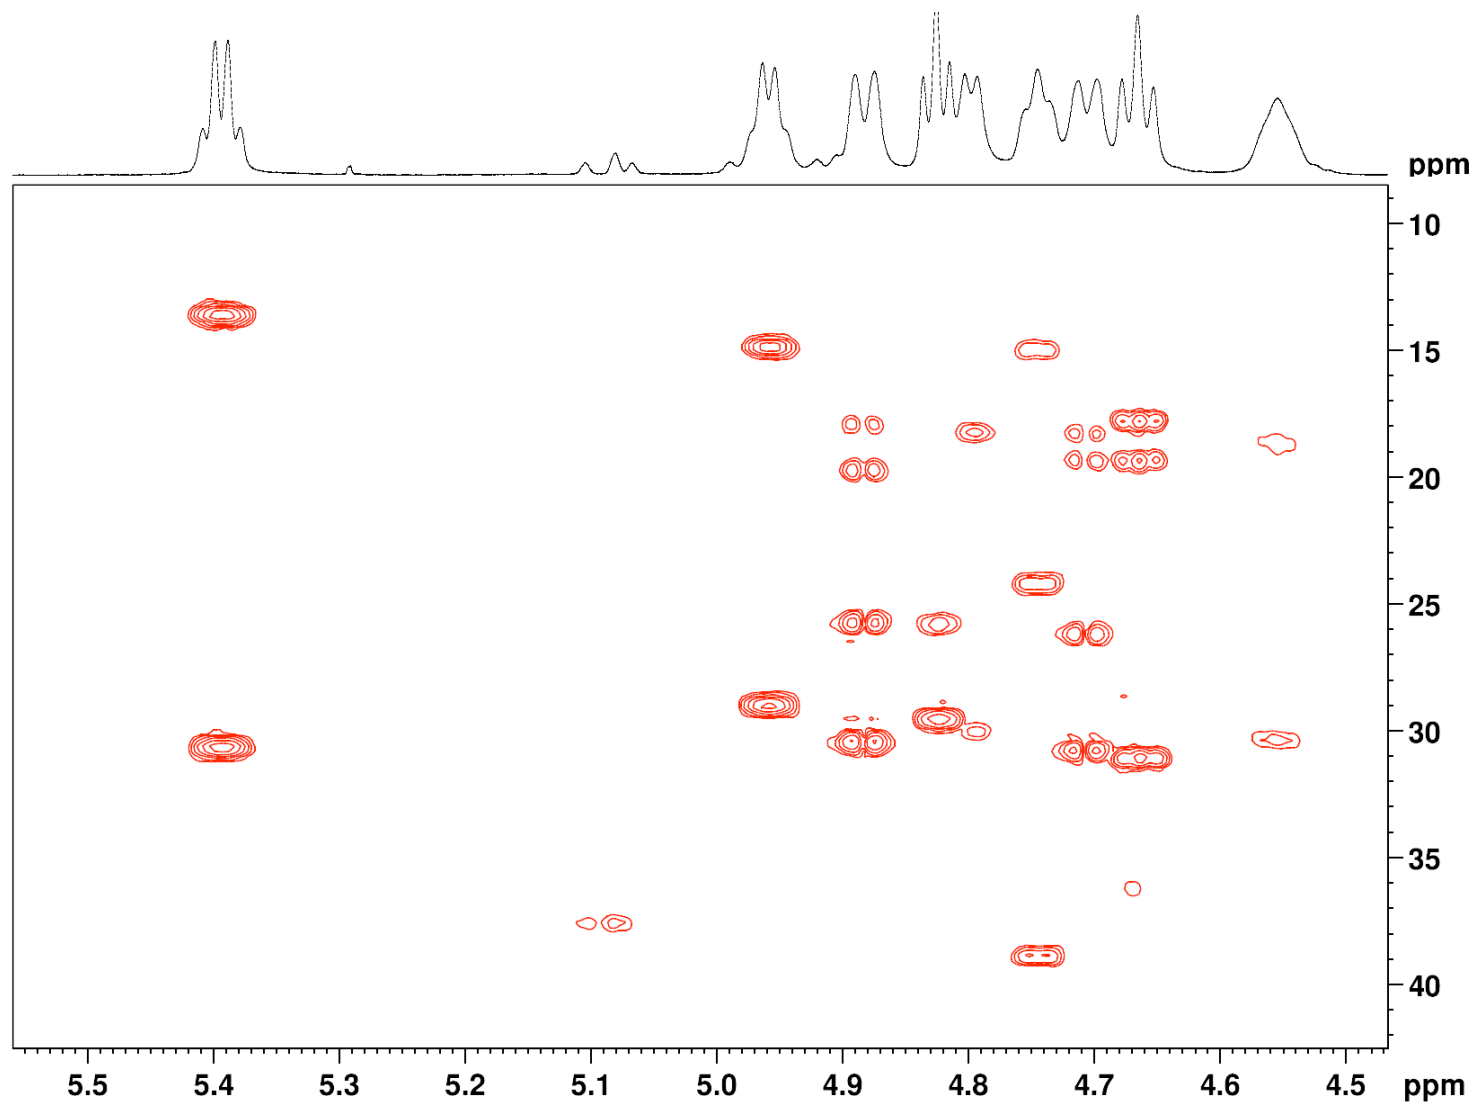

**Figure S13B.** Expanded partial HMBC spectrum for companeramide B (**2**) in  $\text{CDCl}_3$  (700 MHz)

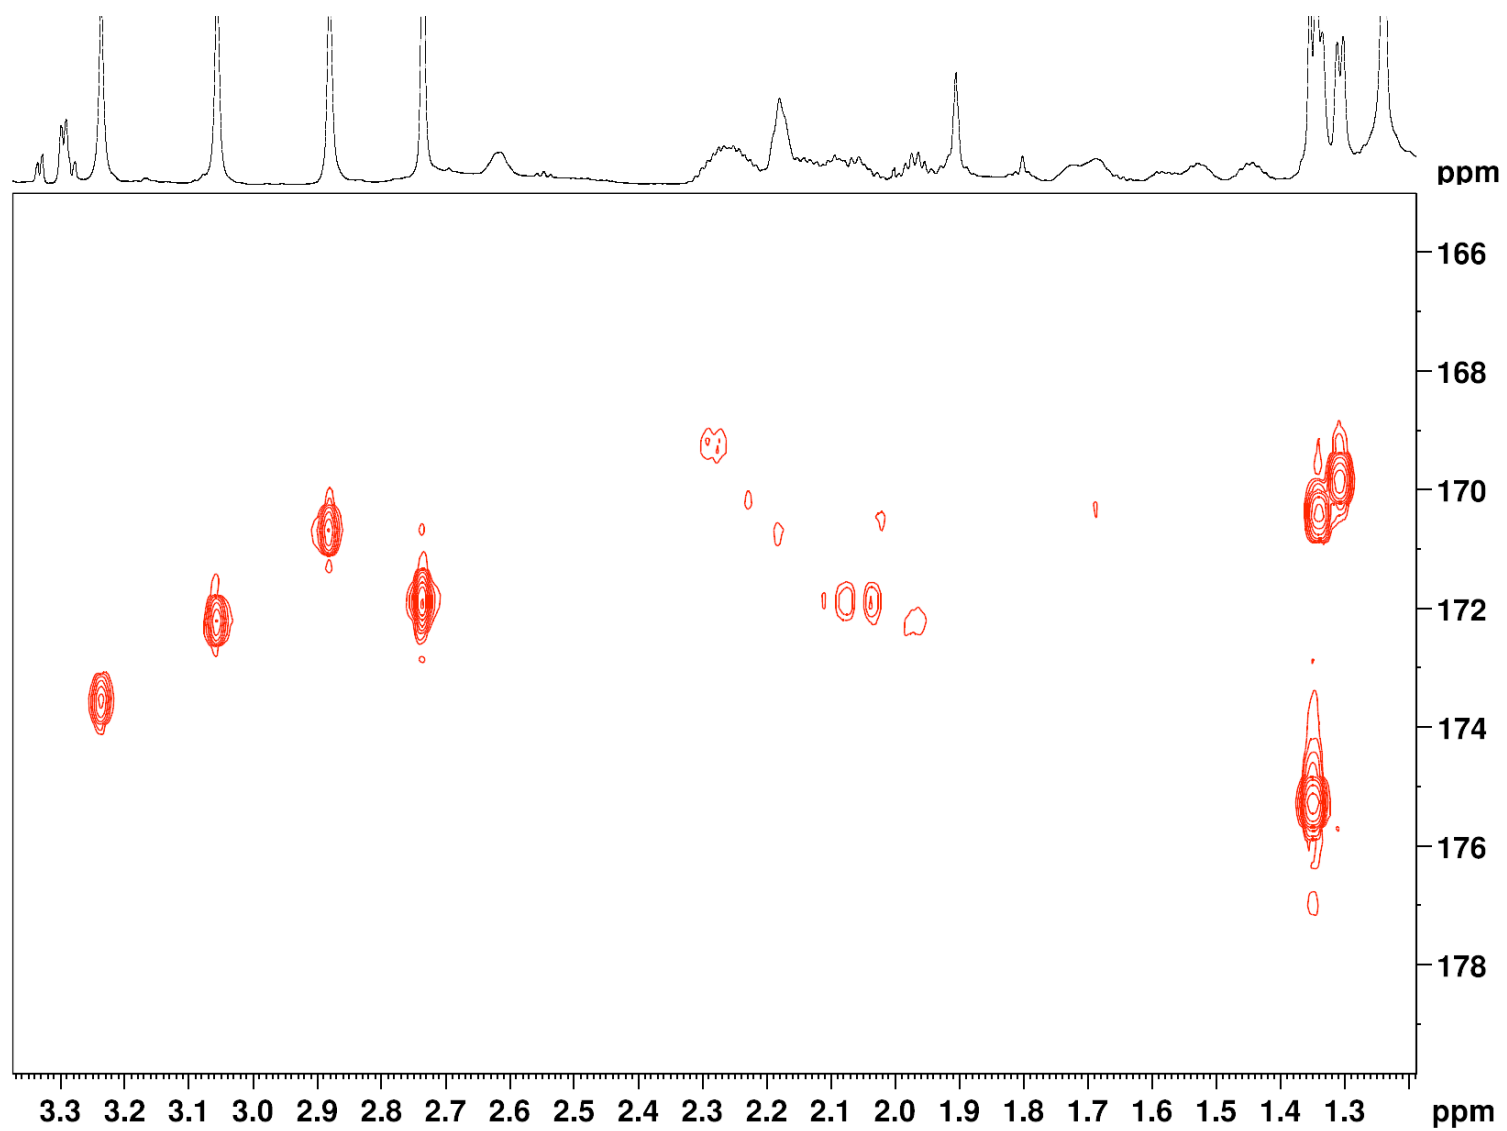

**Figure S13C.** Expanded partial HMBC spectrum for companeramide B (**2**) in  $\text{CDCl}_3$  (700 MHz)



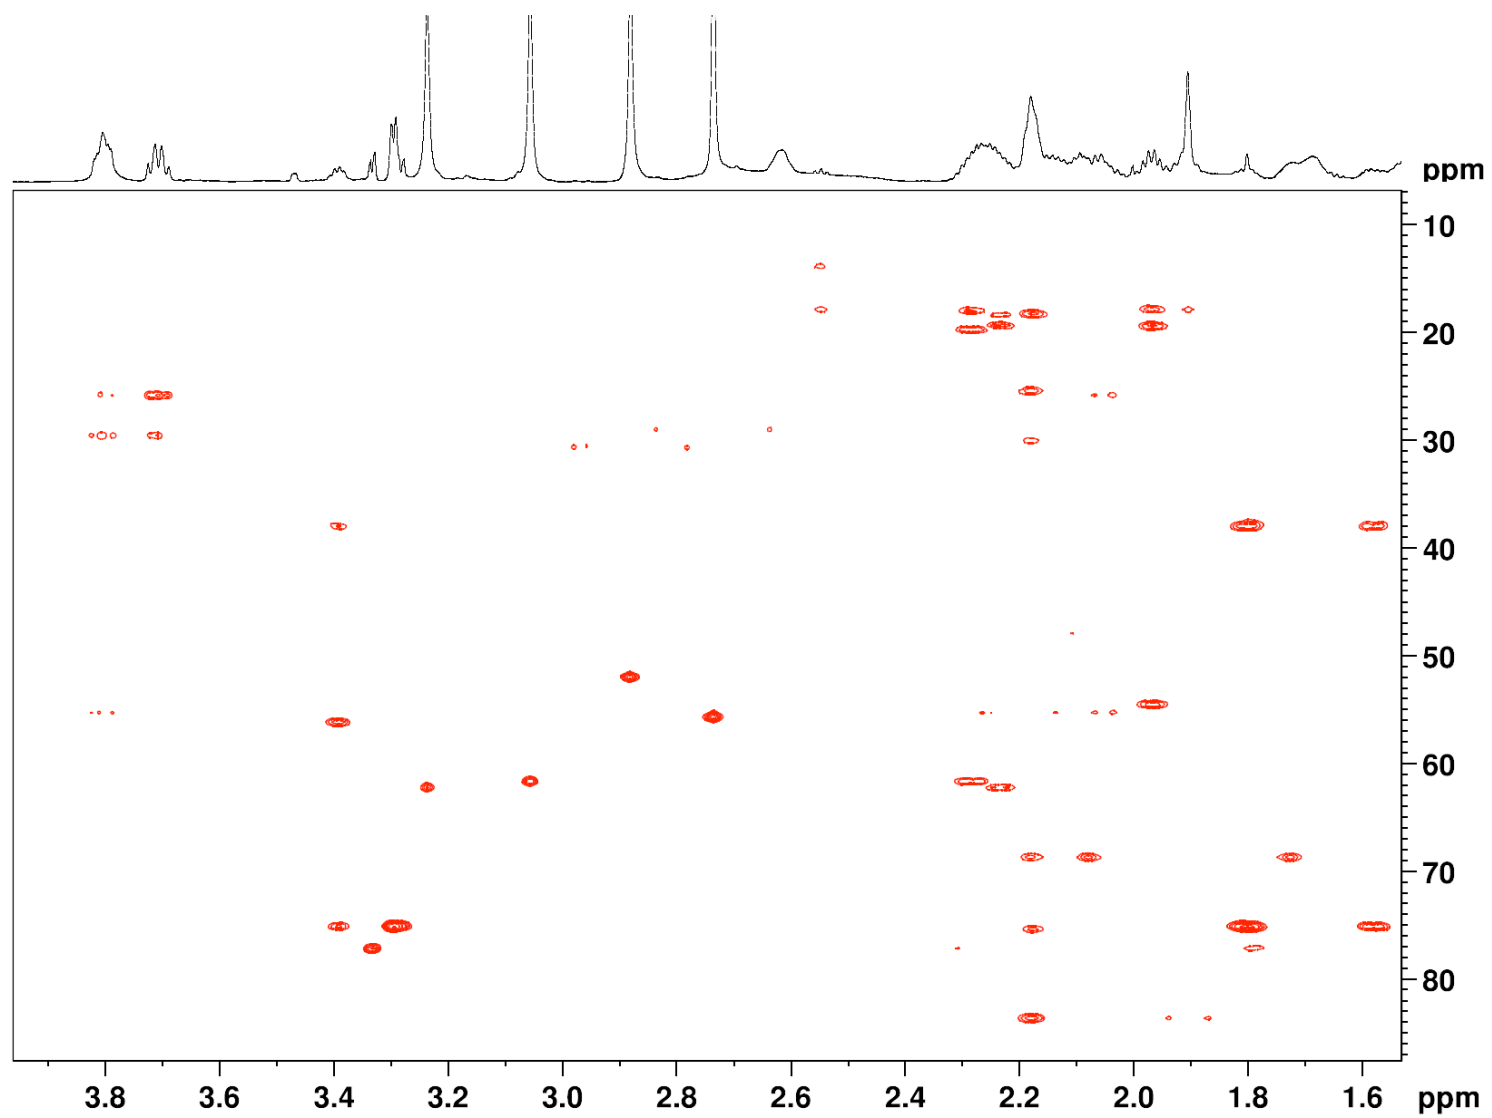

**Figure S13D.** Expanded partial HMBC spectrum for companeramide B (**2**) in CDCl<sub>3</sub> (700 MHz)

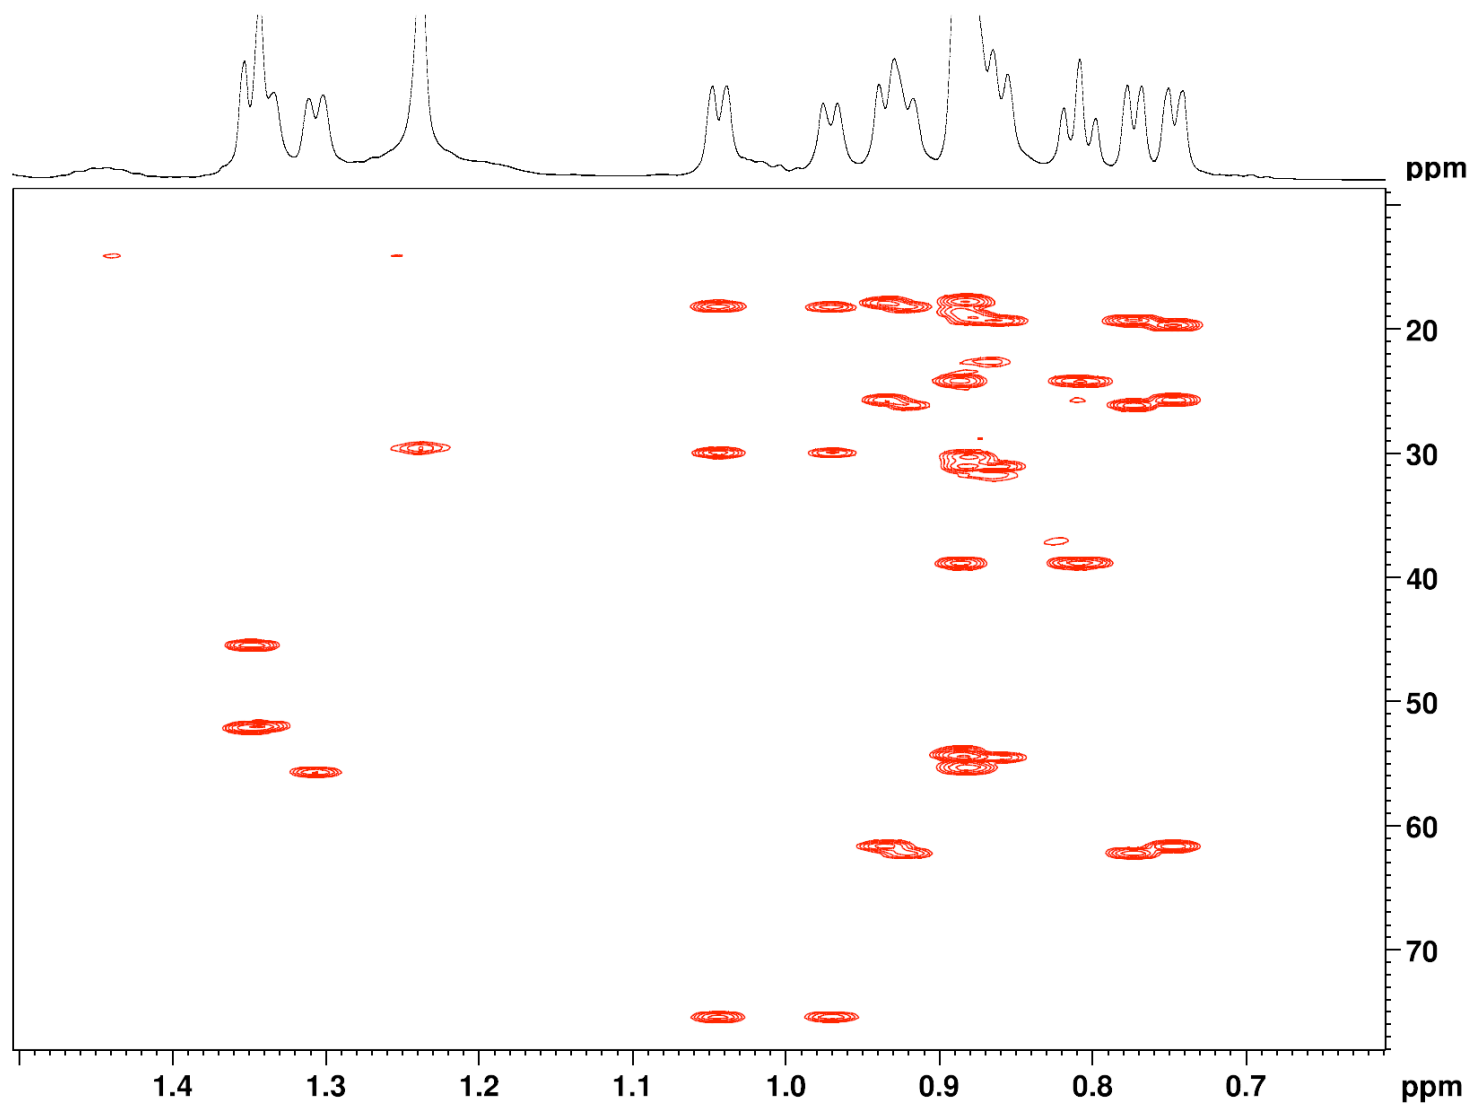

**Figure S13E.** Expanded partial HMBC spectrum for companeramide B (**2**) in CDCl<sub>3</sub> (700 MHz)

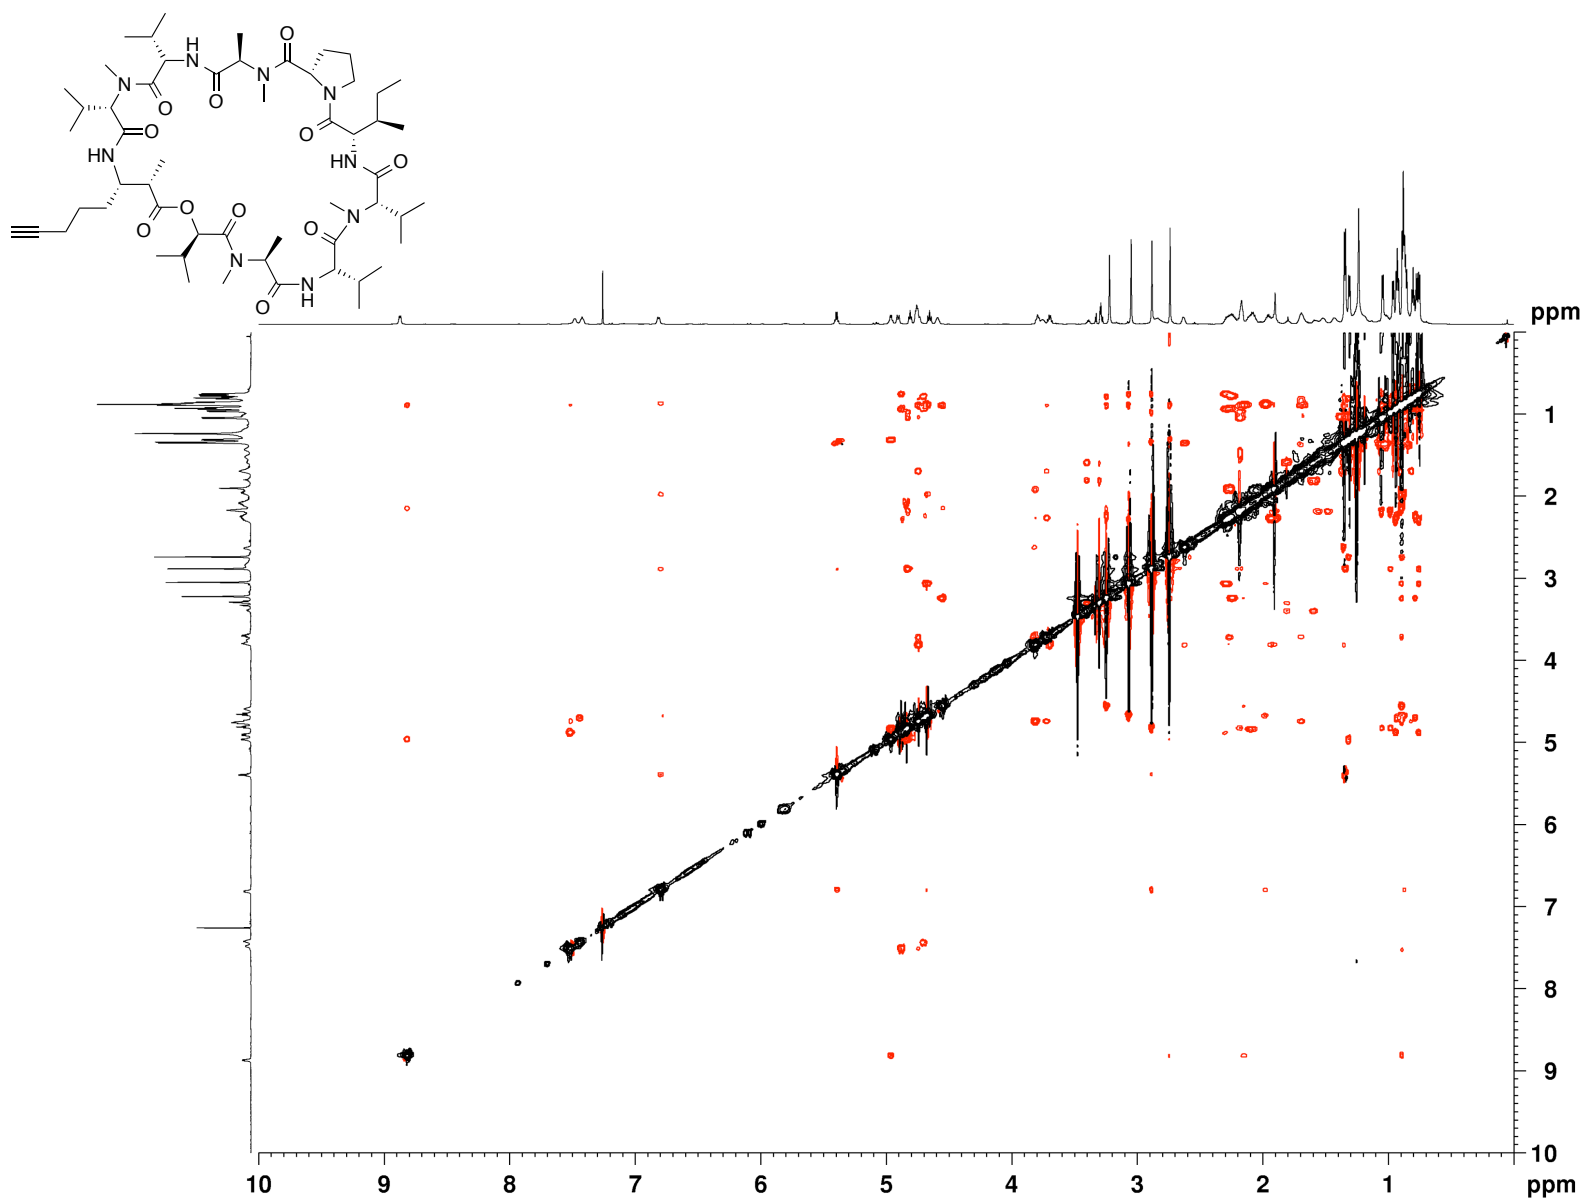

**Figure S14.** ROESY spectrum for companeramide B (**2**) in CDCl<sub>3</sub> (700 MHz)

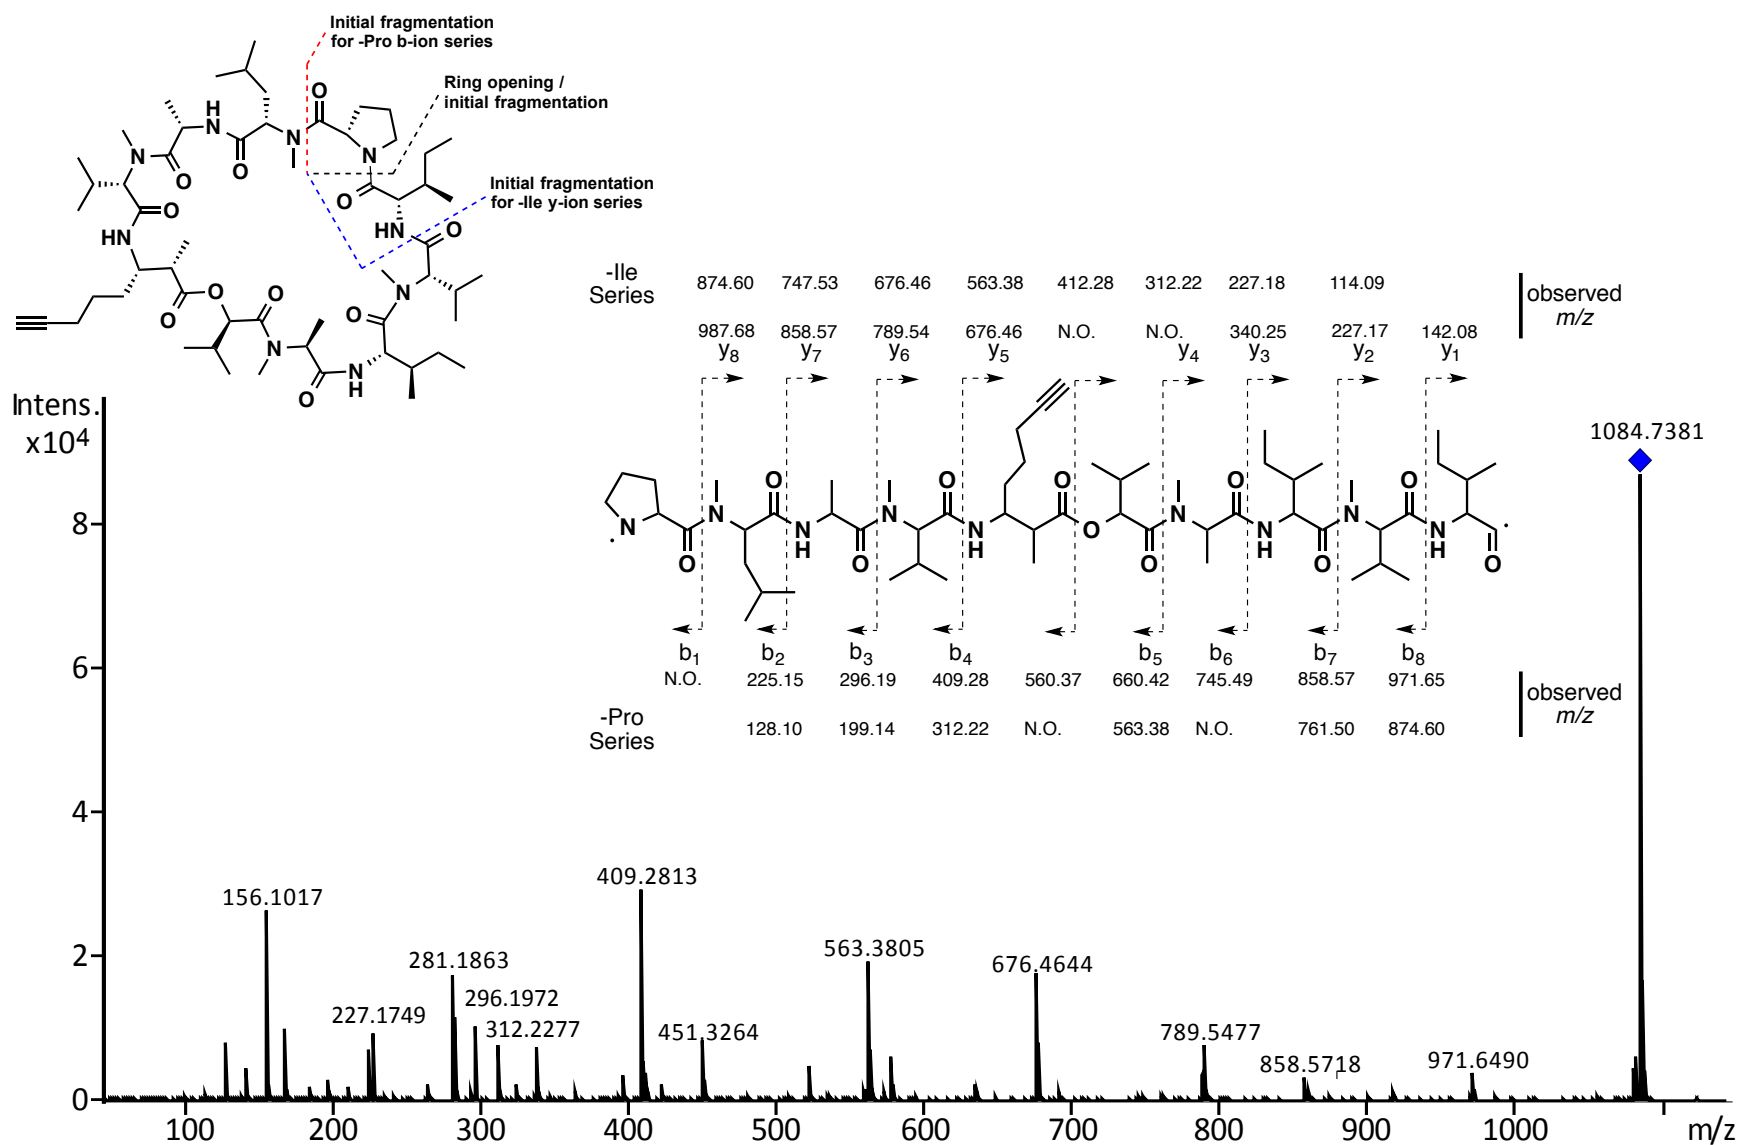

**Figure S15.** Annotated MS/MS spectrum for companeramide A (1) indicating  $[M + H]^+$  ions arising from three alternate initial fragmentation events. N.O. designates ions that were not observed.

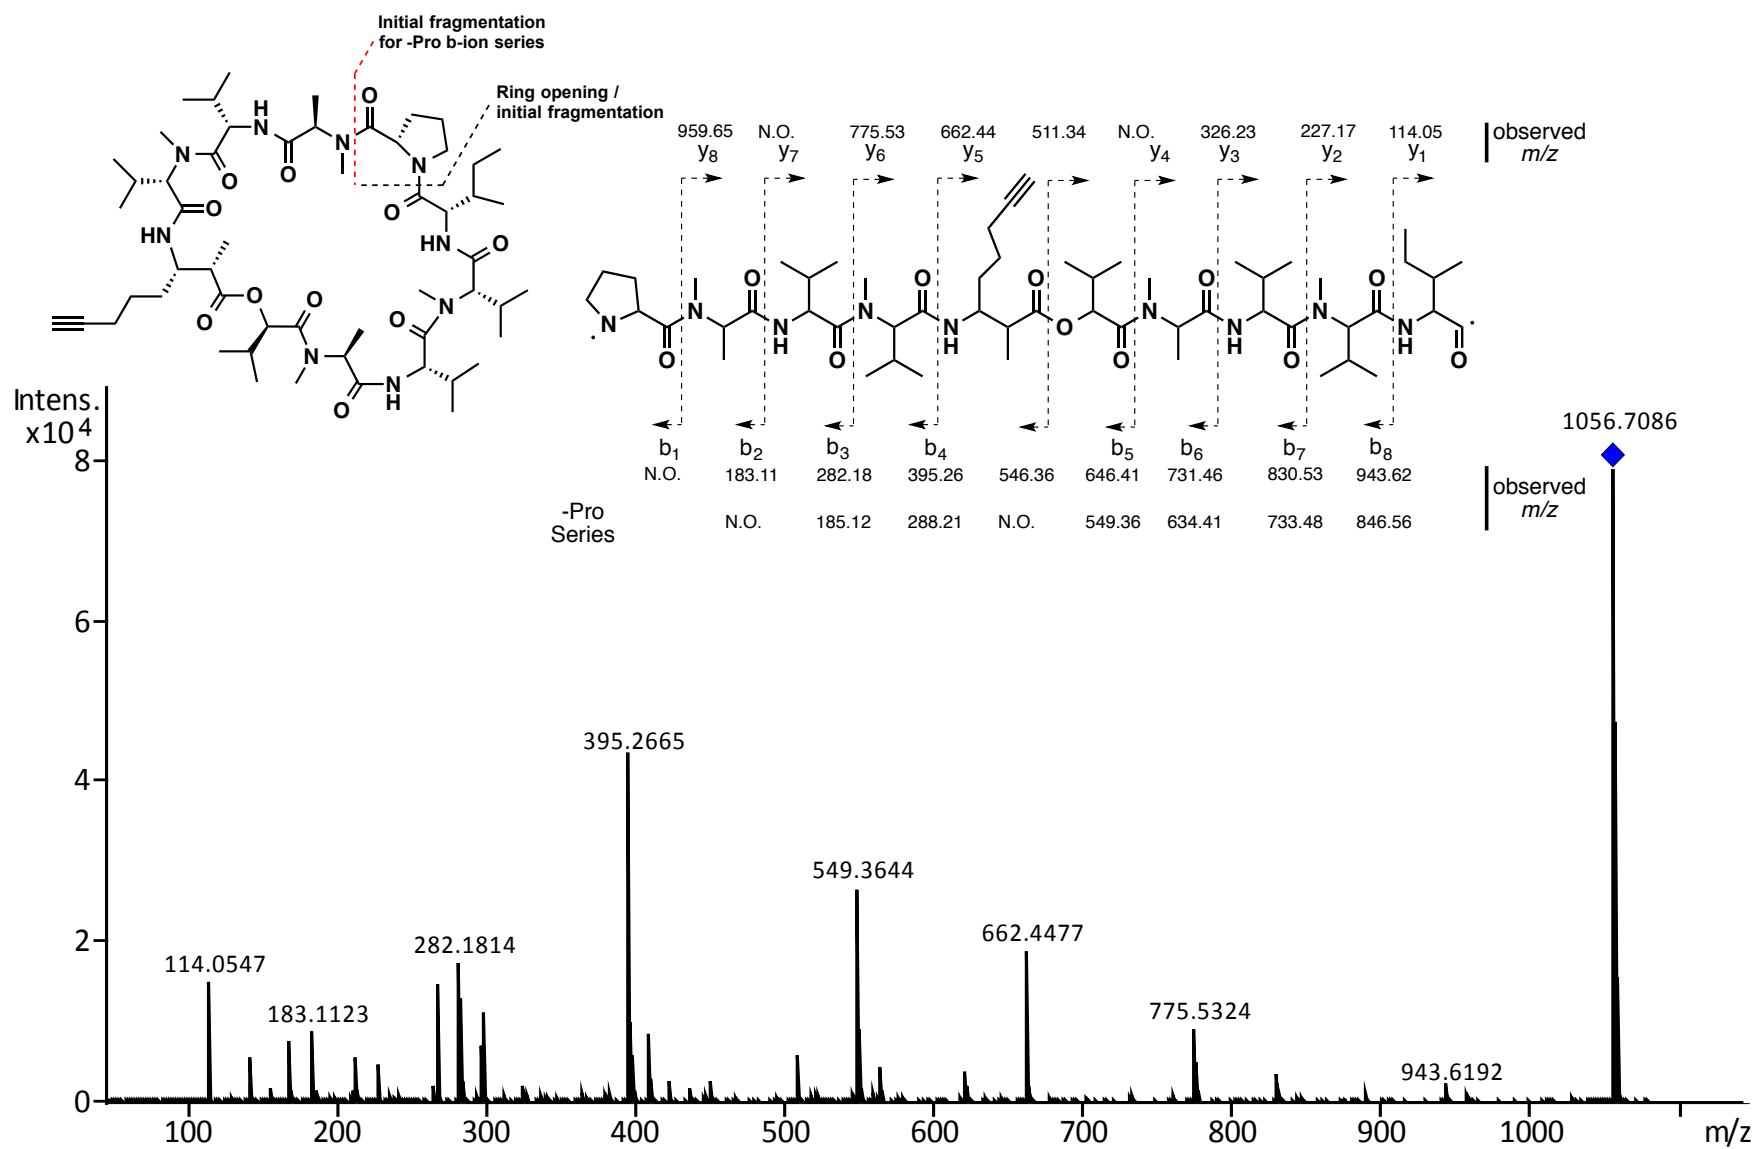

**Figure S16.** Annotated MS/MS spectrum for companeramide B (**2**) indicating  $[M + H]^+$  ions arising from two alternate initial fragmentation events. N.O. designates ions that were not observed.

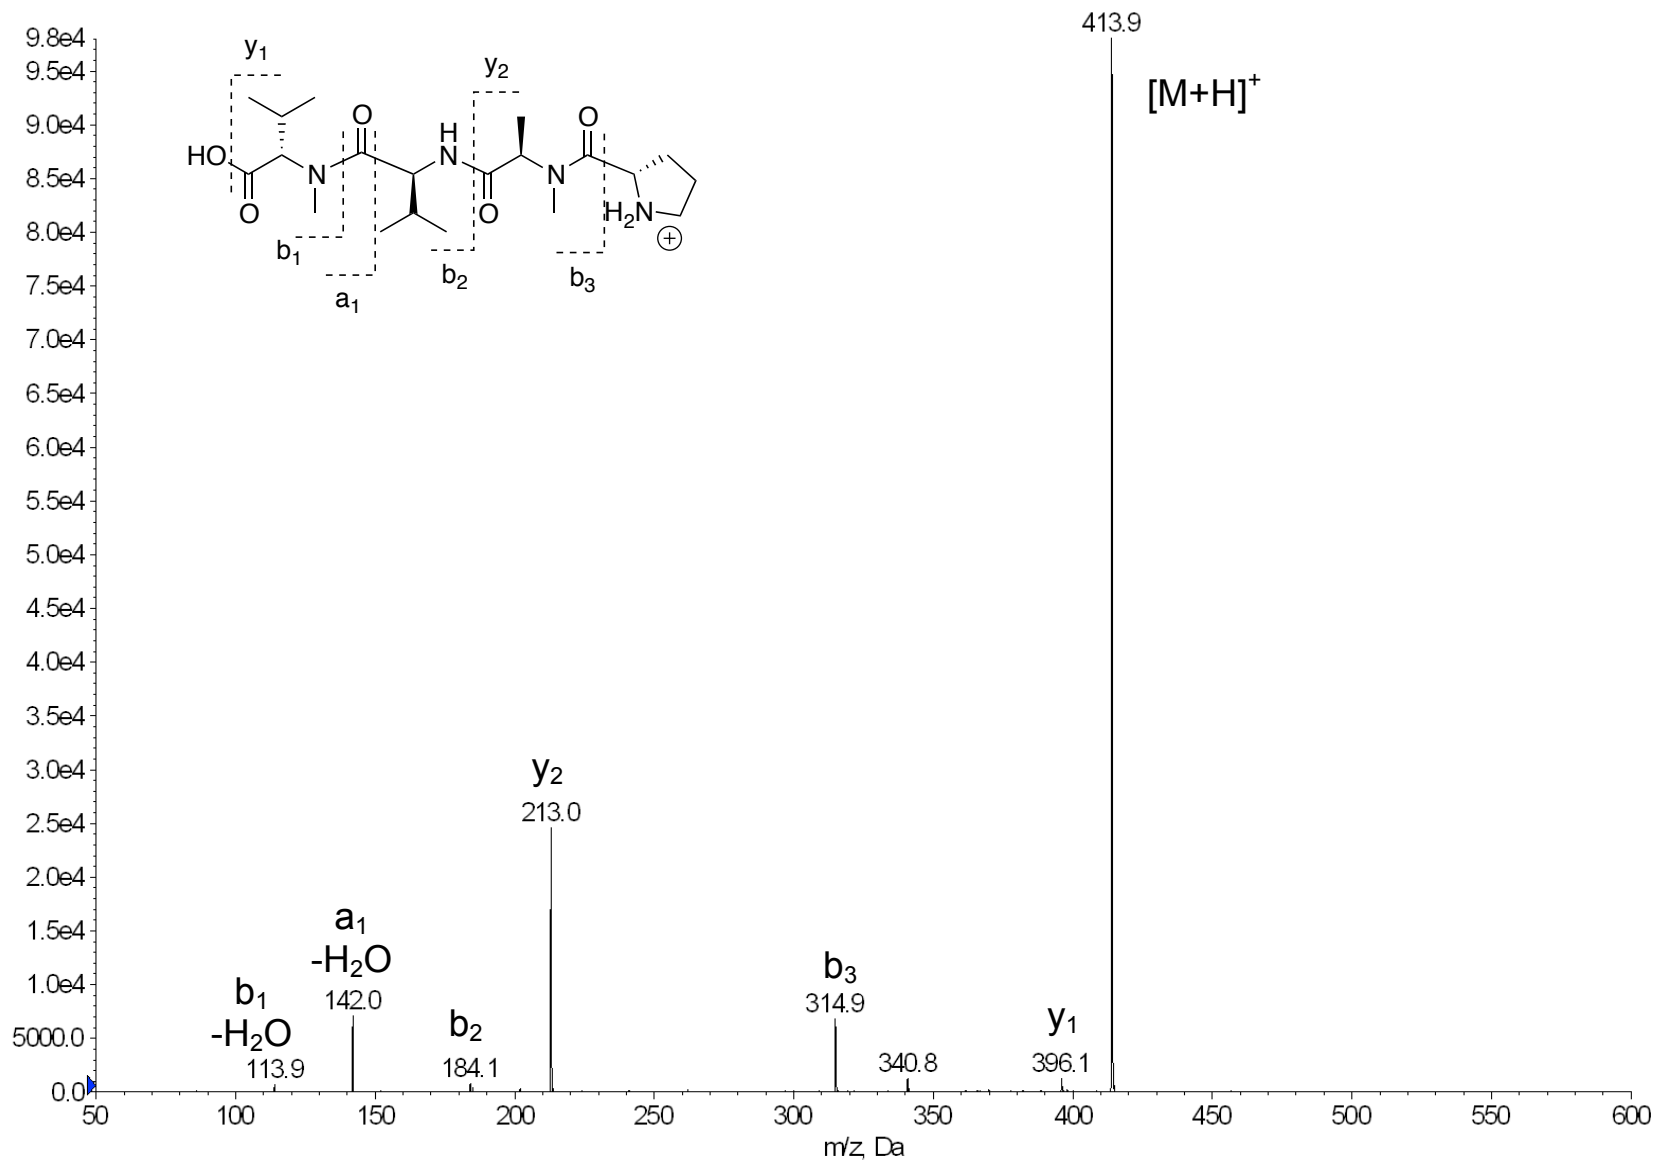

**Figure S17.** Annotated MS/MS spectrum for companeramide B (**2**) tetrapeptide (fragment 1)

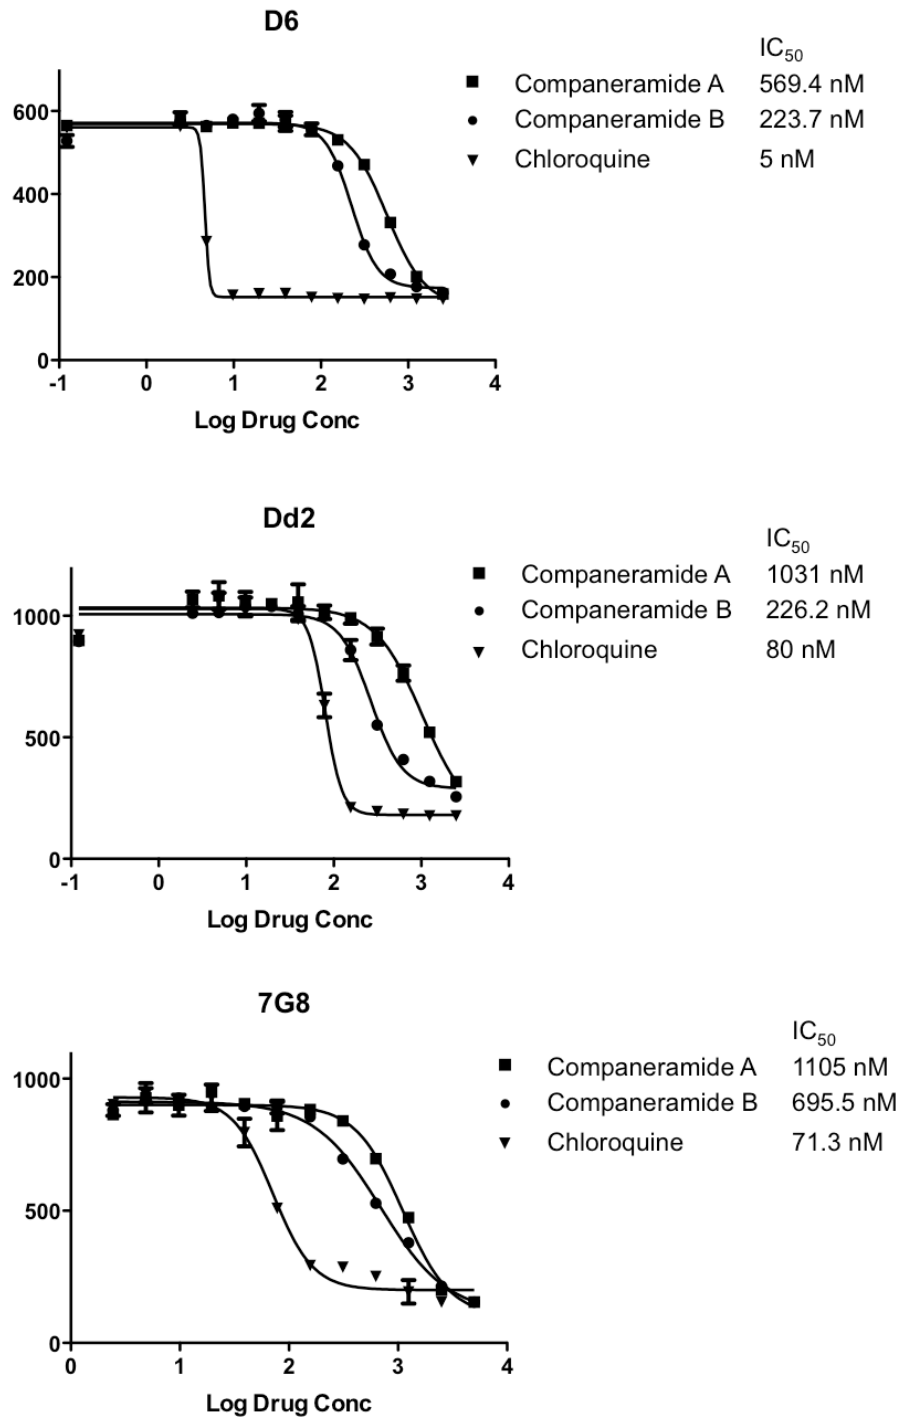

**Figure S18.** Concentration-response profiles for companeramides A (1) and B (2) against three strains of *Plasmodium falciparum*

**S19. DNA Extraction and Amplification of Cyanobacterial 16S rRNA.** A monoculture of the small filament cyanobacterium associated with companionamide production was lysed by mechanical bead beating as previously described<sup>1</sup> and total genomic DNA was purified by phenol-chloroform extraction. The 16S rRNA gene was amplified by PCR using PrimeSTAR GXL polymerase (Takara Bio) from total DNA with the primers CYA106F (5'-CGGACGGGTGAGTAACGCGTGA-3')<sup>2</sup> and 1513R (5'-TACIGITACCTTGTTACGACTT-3').<sup>3</sup> PCR products were cloned into the *EcoRV* site of pBlueScript SK- (Stratagene) and were sequenced with M13 primers that anneal outside of the multiple cloning site.<sup>4</sup> Desired sequences were aligned with MAFFT using the L-INS-i method.<sup>5</sup>

**Phylogenetic Analysis.** Phylogenetic analysis utilized bayesian inference with MrBayes software<sup>6</sup> using the GTR+I+G model<sup>7</sup> and was run for 6 million generations with *Gloeobacter violaceus* PCC 7412 (NR074282) as the outgroup. The 16S rRNA gene sequence of this small filament cyanobacterium (GenBank Accession number: KM882611) was found to be 99% similar to the filamentous cyanobacterium FLK9 isolated from the surface mat of the coral *Colpophyllia natans* from the Florida Keys. Construction of a phylogenetic tree showed that our small filament cyanobacterium PAC-10-3 csf1 clustered together with other filamentous marine strains (Figure S20), some of which are associated with Black Band Disease in coral.<sup>8</sup> Interestingly, unicellular *Synechococcus* strains (clustered with PAC-10-3 csf1) cluster with *Prochlorothrix* and *Geitlerinema* in a similar arrangement to that generated by a full genome phylogenetic comparison.<sup>9</sup>



## References

- (1) Campbell, E. L.; Summers, M. L.; Christman, H.; Martin, M. E.; Meeks, J. *C. J. Bacteriol.* **2007**, *189*, 5247–5256.
- (2) Nübel, U.; Garcia-Pichel, F.; Muyzer, G. *Appl. Environ. Microbiol.* **1997**, *63*, 3327–3332.
- (3) Eder, W.; Ludwig, W.; Huber, R. *Arch. Microbiol.* **1999**, *172*, 213–218.
- (4) Messing, J. *Methods Enzymol.* **1983**, *101*, 20-78.
- (5) Katoh, K.; Toh, H. *Brief. Bioinform.* **2008**, *9*, 286-298.
- (6) Ronquist, F.; Huelsenbeck, J. P. *Bioinformatics* **2003**, *19*, 1572-1574.
- (7) Tavaré, S. In *Lectures on Mathematics in the Life Sciences*; Miura, R. M., Ed.; Providence: American Mathematical Society: New York, New York, 1986; Vol. 17, p 57-86.
- (8) Meyers, J. L.; Richardson, L. L. *FEMS Microbiol. Ecol.* **2009**, *67*, 242-251.
- (9) Shih, P. M.; Wu, D.; Latifi, A.; Axen, S. D.; Fewer, D. P.; Talla, E.; Calteau, A.; Cai, F.; Tandeau de Marsac, N.; Rippka, R.; Herdman, M.; Sivonen, K.; Coursin, T.; Laurent, T.; Goodwin, L.; Nolan, M.; Davenport, K. W.; Han, C. S.; Rubin, E. M.; Eisen, J. A.; Woyke, T.; Gugger, M.; Kerfeld, C. A. *Proc. Natl. Acad. Sci. U.S.A.* **2013**, *110*, 1053-1058.

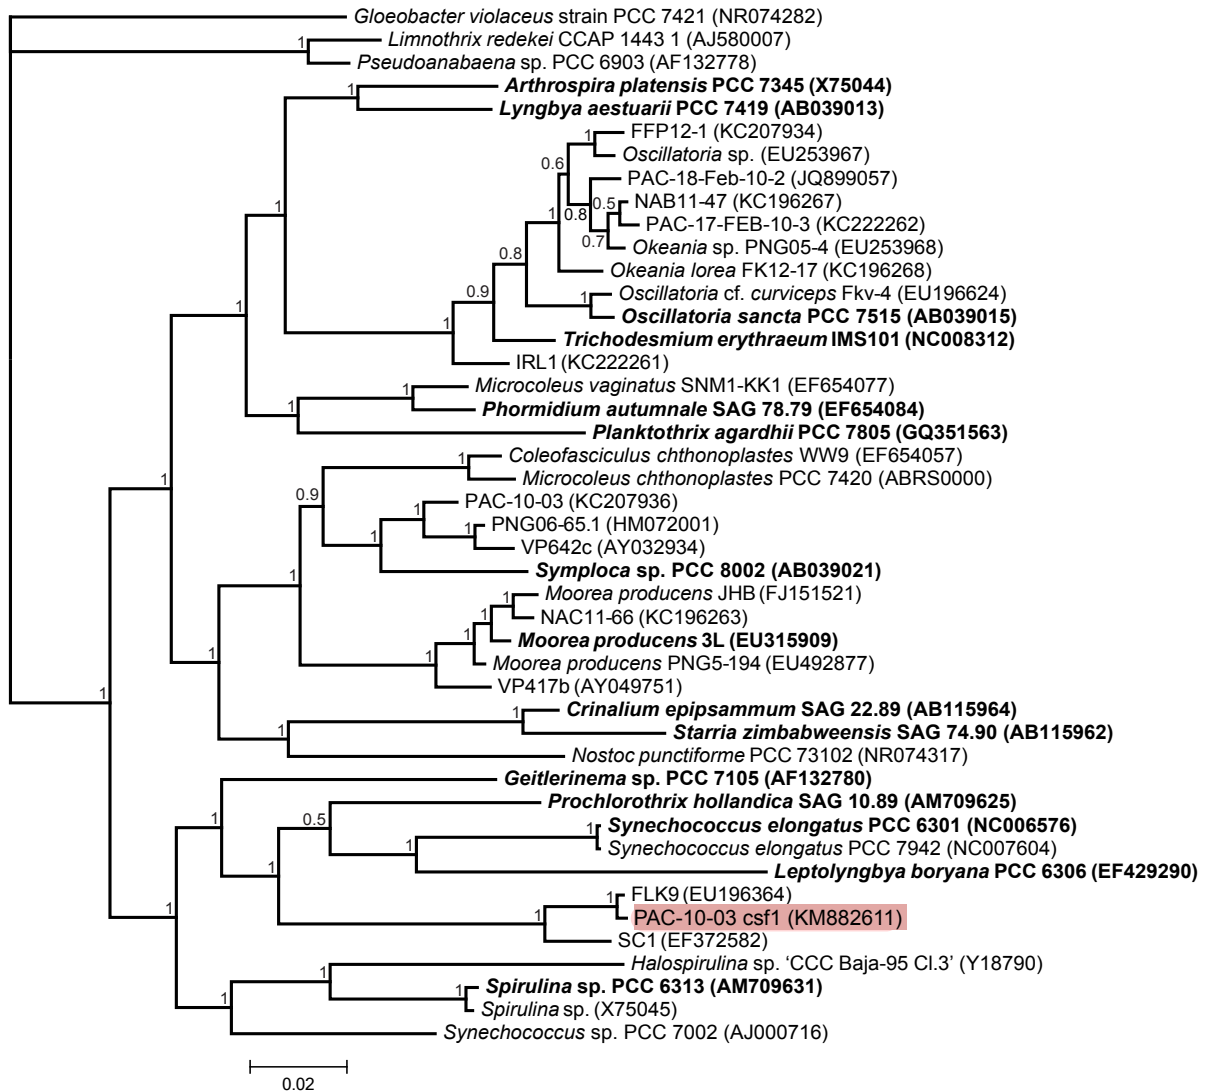

**Figure S20.** Phylogenetic tree of known natural product-producing marine cyanobacteria in relation to strain PAC-10-03 csf1 (highlighted in red), and its two closest BLAST hits FLK9 and SC1. Reference strains are in bold. *Gloeobacter violaceus* strain PCC 7412 was used as an outgroup. 16S rRNA analysis is based on Bayesian inference using the MrBayes software package and node values indicate posterior probability of occurrence. Scale bar indicates 0.05 nucleotide substitutions per site.

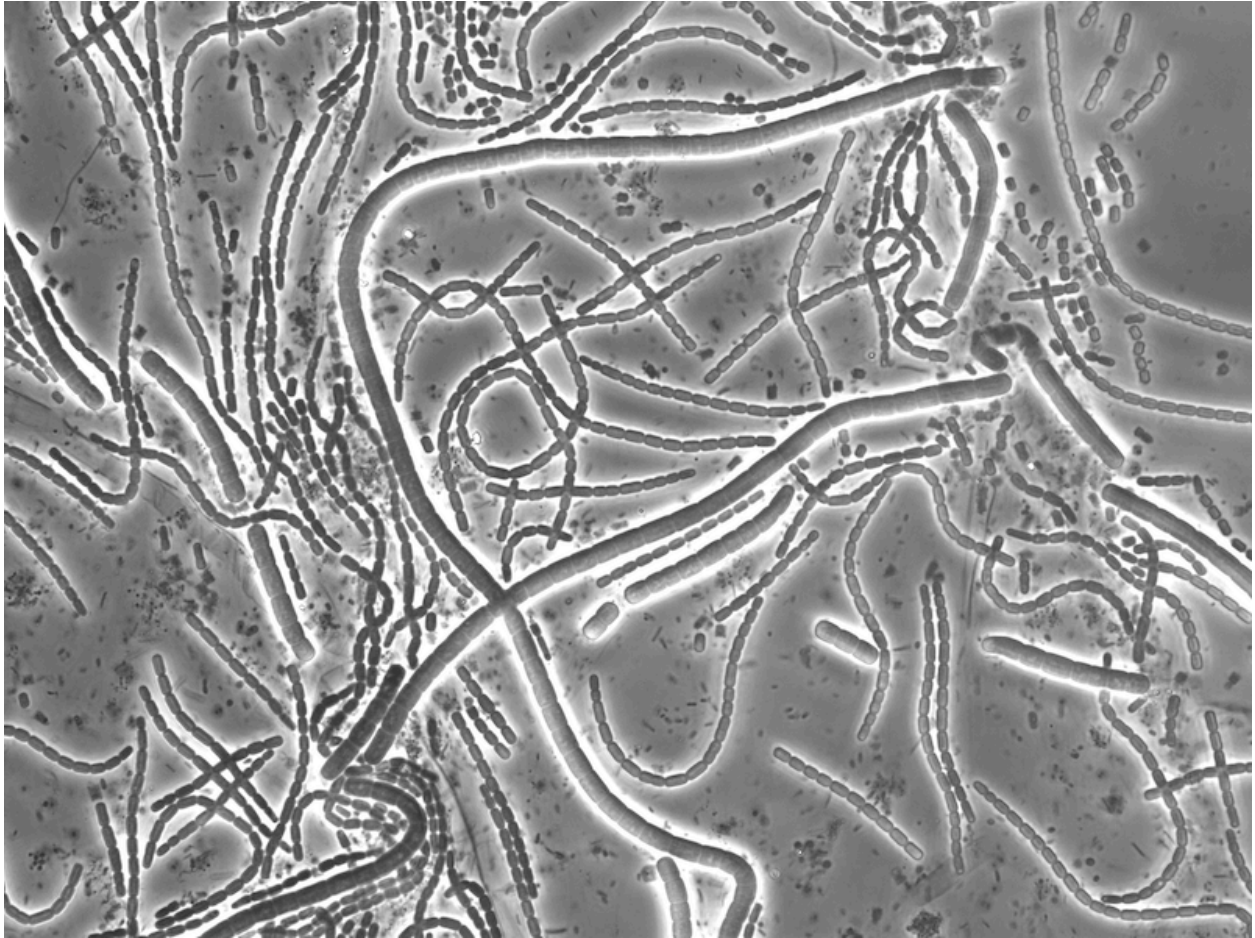

**Figure S21.** Phase contrast micrograph (60 X magnification) of the laboratory cultured cyanobacterial assemblage from field collection PAC-10-3, showing relative abundance of the large filament *Symploca*-type (GenBank # KC207936) and small filament (GenBank # KM882611) cyanobacteria.
